# Supplementary material for: Similar and divergent responses to salinity stress of jamun (Syzygium cumini L. Skeels) genotypes
Source: PeerJ. 2024 May 14;12:e17311. doi: 10.7717/peerj.17311 (PMC11100480; doi:10.7717/peerj.17311)
Supplement: Supplemental Information 1 [file peerj-12-17311-s001.xlsx]

## Sheet: Supplementary Table 1
Supplementary Table 1
Ionic composition of control and saline waters used in irrigation.
EC	pH	Na+	K+	Ca+Mg	Cl-	HCO3-
(dS/m)		(meq/l)
0.7 (control)	8.09	2.47	0.17	4.25	1.02	4.51
2	8.03	3.2	0.19	8.25	8.08	6.02
4	8.1	28.49	0.23	14.5	18.25	5.5
6	8.02	43.47	0.27	21.2	29.25	5.35
8	8.14	63.5	0.33	28.45	42.75	5.01
10	8.09	90.01	0.38	35.8	55.63	4.4
12	7.99	117.88	0.45	47.08	73.75	3.8
Note: meq/l refers to milliequivalents per litre

## Sheet: Supplementary Table 2
Supplementary Table 2
Mean values of leaf, stem, root and plant biomass under control and saline conditions.
Genotype	LDM		SDM		RDM		PDM		Shoot dry mass (LDM + SDM)		SRR
	Control	Saline	Control	Saline	Control	Saline	Control	Saline	Control	Saline	Control	Saline
Monoembryonic types
CSJ-2	17.49	14.41	5.39	2.88	6.32	5	29.2	22.29	22.88	17.29	3.62025	3.458
CSJ-4	18.26	13.3	6.11	3.97	11.41	8.47	35.78	25.74	24.37	17.27	2.13585	2.03896
CSJ-5	18.16	16.01	4.94	4.89	8.7	6.63	31.8	27.53	23.1	20.9	2.65517	3.15234
CSJ-12	17.13	14.53	5.8	3.71	10.96	6.75	33.89	24.99	22.93	18.24	2.09215	2.70222
CSJ-15	21.78	16.48	10.89	5.73	14.62	11.32	47.3	33.53	32.67	22.21	2.23461	1.96201
CSJ-16	21.8	15.28	9.12	5.48	10.74	10.24	41.66	31	30.92	20.76	2.87896	2.02734
CSJ-18	18.94	17.03	7.17	6.47	10.76	9.74	36.86	33.23	26.11	23.5	2.42658	2.41273
CSJ-20	19.7	14.94	7.95	4.92	7.83	6.26	35.48	26.12	27.65	19.86	3.53129	3.17252
CSJ-21	20.03	15.88	6.65	5.35	10.44	9.4	37.12	30.62	26.68	21.23	2.55556	2.25851
CSJ-28	18.6	10.83	5.94	2.47	5.74	2.95	30.28	16.24	24.54	13.3	4.27526	4.50847
CSJ-29	20.57	13.08	8.02	6.01	10.33	8.35	38.92	27.43	28.59	19.09	2.76767	2.28623
CSJ-31	20.12	12.6	8.89	4.26	5.88	4.6	34.88	21.46	29.01	16.86	4.93367	3.66522
CSJ-32	20.96	14.65	9.76	7.22	10.16	7.34	40.88	29.2	30.72	21.87	3.02362	2.97956
CSJ-33	16.26	12.55	7.18	4.12	11.55	7.07	34.99	23.73	23.44	16.67	2.02944	2.35785
CSJ-35	19.31	15.12	5.72	5.53	6.47	6.07	31.5	26.72	25.03	20.65	3.86862	3.40198
CSJ-38	18.28	14.56	6.43	5.21	9.74	9.48	34.45	29.24	24.71	19.77	2.53696	2.08544
CSJ-42	17.6	13.5	7.92	5.87	17.24	13.18	42.76	32.54	25.52	19.37	1.48028	1.46965
CSJ-43	17.84	13.61	8.03	5.61	24.77	13.57	50.63	32.78	25.87	19.22	1.04441	1.41636
CSJ-45	13.7	11.95	3.53	2.88	6.46	5.16	23.69	19.99	17.23	14.83	2.66718	2.87403
CSJ-47	24.66	16.64	14.1	7.45	12.87	7.84	51.62	31.93	38.76	24.09	3.01166	3.0727
Mean	19.0595	14.3475	7.477	5.0015	10.6495	7.971	37.1845	27.3155	26.5365	19.349	2.78846	2.66511
Polyembryonic types
CSJ-1	20.3	15.04	5.25	2.18	7.17	5.1	32.72	22.31	25.55	17.22	3.56346	3.37647
CSJ-3	18.06	14.92	6.06	4.2	10.4	8.29	34.52	27.41	24.12	19.12	2.31923	2.30639
CSJ-6	18.86	14.22	5.55	4.3	8.02	6.51	32.42	25.03	24.41	18.52	3.04364	2.84485
CSJ-7	19.24	15.68	5.45	4.62	8.89	8.37	33.58	28.67	24.69	20.3	2.77728	2.42533
CSJ-8	18.39	15.25	5.32	4.39	8.66	8.39	32.37	28.03	23.71	19.64	2.73788	2.34088
CSJ-9	20.9	16.79	6.54	4.86	8.91	6.91	36.35	28.56	27.44	21.65	3.07969	3.13314
CSJ-10	21.71	17.18	8.03	5.88	10.47	8.12	40.21	31.18	29.74	23.06	2.8405	2.8399
CSJ-11	20.68	15.51	6.38	5.11	9.98	8.22	37.04	28.84	27.06	20.62	2.71142	2.50852
CSJ-13	19.03	14.8	5.89	4	10.68	10.12	35.61	28.92	24.92	18.8	2.33333	1.85771
CSJ-14	22.27	19.75	7.33	7.05	15.54	12.57	45.13	39.37	29.6	26.8	1.90476	2.13206
CSJ-17	18.8	16.62	7.07	6.9	13.35	10.39	39.22	33.91	25.87	23.52	1.93783	2.26372
CSJ-19	21.75	19.91	10.2	8.26	10.97	10.02	42.92	38.19	31.95	28.17	2.91249	2.81138
CSJ-22	21.17	14.32	3.94	3.04	8.45	7.63	33.55	24.99	25.11	17.36	2.9716	2.27523
CSJ-23	22.66	16.02	6.9	4.09	10.3	9.5	39.86	29.61	29.56	20.11	2.8699	2.11684
CSJ-24	20.77	16.08	9.53	5.53	17.9	11.98	48.19	33.59	30.3	21.61	1.69274	1.80384
CSJ-25	22.03	16.45	10.26	5.33	14.58	11.21	46.87	32.98	32.29	21.78	2.21468	1.94291
CSJ-26	19.19	14.83	7.62	3.99	13.03	8.11	39.83	26.93	26.81	18.82	2.05756	2.32059
CSJ-27	23.78	17.29	10.88	4.9	12.42	7.81	47.08	30	34.66	22.19	2.79066	2.84123
CSJ-30	21.18	15.03	8.56	5.16	8.68	7.3	38.42	27.49	29.74	20.19	3.42627	2.76575
CSJ-34	24.74	16.89	7.93	4.98	14.37	12.06	47.03	33.94	32.67	21.87	2.27349	1.81343
CSJ-36	20.27	15.01	8.12	5.83	11.41	8.6	39.8	29.43	28.39	20.84	2.48817	2.42326
CSJ-37	19.86	15.76	8.96	5.91	10.21	7.77	39.02	29.45	28.82	21.67	2.82272	2.78893
CSJ-39	22.94	18.64	7.06	5.49	14.75	13.3	44.75	37.43	30	24.13	2.0339	1.81429
CSJ-40	23.05	22.48	11.84	8.26	17.62	12.63	52.5	43.37	34.89	30.74	1.98014	2.43389
CSJ-41	19.3	15.31	4.91	3.58	9.84	9.22	34.05	28.11	24.21	18.89	2.46037	2.04881
CSJ-44	22.38	14.9	7.14	4.51	12.85	12.6	42.36	32.01	29.52	19.41	2.29728	1.54048
CSJ-46	25.45	16.97	13.64	9.8	11.24	10.32	50.33	37.09	39.09	26.77	3.47776	2.59399
CSJ-48	23.97	21.18	8.72	6.8	12.46	10.57	45.14	38.56	32.69	27.98	2.6236	2.64711
Mean	21.1689	16.5296	7.68143	5.31964	11.5411	9.415	40.3882	31.2643	28.8504	21.8493	2.59437	2.39325
Note: LDM- leaf dry mass (g/plant), SDM- stem dry mass (g/plant), RDM- root dry mass (g/plant), PDM- plant dry mass (g/plant), SRR- shoot to root ratio

## Sheet: Supplementary Table 3
Supplementary Table 3
Mean values of leaf, stem and root ions under control and saline conditions.
Genotype	Leaf Na		Leaf K		Leaf Cl		Leaf Ca		Leaf Mg		Stem Na		Stem K		Stem Cl		Stem Ca		Stem Mg		Root Na		Root K		Root Cl		Root Ca		Root Mg
	Control	Saline	Control	Saline	Control	Saline	Control	Saline	Control	Saline	Control	Saline	Control	Saline	Control	Saline	Control	Saline	Control	Saline	Control	Saline	Control	Saline	Control	Saline	Control	Saline	Control	Saline
Monoembryonic types
CSJ-2	1.21	2.34167	4.89	3.38	0.88	1.34	14.0333	12.5167	7.91667	7.41667	2.11667	4.40333	8.84667	5.90833	0.148333	0.331667	5.78333	9.36667	3.83333	5.18333	1.87333	2.135	3.69	2.99833	0.818333	1.045	13.0333	9.36667	4.73333	3.63333
CSJ-4	1.33667	2.94833	3.79667	3.67833	1.255	1.56333	17.45	18.2667	7.05	7.48333	1.67833	3.69833	12.9317	8.18167	0.21	0.23	5.88333	8.35	6.26667	6.38333	1.515	1.76167	3.58	3.01	0.511667	0.648333	10.35	8.38333	2.56667	1.86667
CSJ-5	1.62333	2.555	3.28833	3.225	1.37833	2.29	21.4833	18.9167	7.5	7.98333	1.58333	3.18667	7.75167	7.35833	0.161667	0.36	5.41667	9.88333	4.95	6.13333	1.49667	1.86667	3.61167	3.105	0.566667	0.641667	15.85	9.48333	3.13333	2.31667
CSJ-12	1.07167	2.93833	4.34	3.12	0.515	0.676667	21.5167	18.2167	7.3	7.83333	1.78	1.83167	6.595	6.71833	0.41	0.821667	8.36667	13	3.91667	4.38333	1.41833	2.295	3.545	2.955	0.473333	0.628333	14.9	15.6167	3.28333	2.73333
CSJ-15	1.195	2.82667	4.02	3.215	0.83	1.495	15.2833	15.55	7.25	7.28333	1.97333	2.91167	7.55833	7.475	0.7	0.72	9.26667	16.25	5.16667	7.33333	1.81333	2.37	2.98333	3.29833	0.615	0.7	16.7833	14.8167	2.28333	3.83333
CSJ-16	1.005	2.21667	3.40167	2.67333	0.861667	0.996667	15.45	15.85	6.96667	7.48333	1.375	2.21167	9.67667	7.17333	0.7	0.71	9.3	28.15	5.96667	9.38333	1.57	2.78333	3.62167	4.07333	0.471667	0.773333	19.1167	20.0667	3.83333	4.13333
CSJ-18	1.42	2.97167	4.19833	3.69167	1.04	1.875	16.2667	16.7333	7.85	7.53333	1.79833	2.57333	7.62667	7.36833	0.705	1.265	10.9333	15.65	6.91667	5.98333	1.57167	2.21	3.17333	2.96667	0.368333	0.53	19.5167	9.71667	2.88333	0.983333
CSJ-20	1.23333	3.01	4.12333	3.565	0.733333	1.70667	12.65	12.35	8.05	8.15	1.32667	2.765	9.66	9.04667	0.575	0.635	10.0167	10.2667	5.18333	5.33333	1.29333	2.46	3.86333	3.845	0.628333	0.781667	4.63333	14.1333	2.83333	3.43333
CSJ-21	0.68	2.17667	4.02	2.70667	0.331667	0.563333	38.3333	34.8	7.65	10.1833	2.00667	2.20333	6.08833	5.895	0.535	1.33167	17.7667	13.6667	6.33333	7.08333	1.515	3.27	3.68333	3.32333	0.646667	0.745	10.0667	15.9	4.93333	4.61667
CSJ-28	2.50167	5.65833	3.67	3.47	0.5	0.54	14.9	15.05	6.18333	6.95	2.36333	2.56833	6.11167	5.07333	0.873333	0.915	13.9	6.78333	7.98333	5.58333	1.33333	1.52333	2.87167	3.18167	0.626667	0.765	13.7667	11.9167	2.98333	2.36667
CSJ-29	1.54167	3.02	4.79167	2.85833	0.626667	1.06667	13.4167	13.7167	8.01667	9.11667	1.59333	1.78167	7.76	6.06167	0.385	0.571667	11.8833	9.91667	3.45	2.83333	1.77167	2.42	4.19167	4.01667	0.37	0.511667	15.0333	8.21667	3.43333	3.66667
CSJ-31	1.26833	3.18167	4.325	3.36667	1.15333	1.21667	14.2833	14.4167	8.41667	9.41667	1.59333	1.6	11.0467	4.64833	0.308333	0.341667	24.9333	12.2	4.73333	1.93333	1.57833	2.575	3.68167	5.32667	0.128333	0.611667	10.3333	12.0833	2.63333	5.48333
CSJ-32	1.11333	3.62333	3.21	3.14	0.533333	0.791667	13.4	11.5667	7.86667	6.95	1.155	4.425	7.01667	5.94333	0.221667	0.521667	17.55	15.0833	4.25	4.33333	1.9	1.92	3.725	3.65167	0.786667	0.8	29.2167	7.21667	12.8333	3.41667
CSJ-33	1.53667	4.72667	3.03167	2.8	0.571667	0.825	9.98333	10.9833	5.36667	5.51667	1.645	1.715	4.95167	4.65833	0.616667	1.16667	9.11667	9.93333	3.6	5.08333	2.06667	2.11667	4.12833	3.46	0.538333	0.62	16.8833	17.8167	4.08333	10.3667
CSJ-35	3.86667	8.96667	3.855	3.15167	0.515	0.563333	13.5833	12.85	6.85	7.33333	1.79667	2.05333	8.01	4.99333	0.616667	1.88	10.05	9.75	6.6	8.03333	1.515	2.145	3.69167	3.48167	0.33	0.381667	15.0167	10.2833	3.98333	5.71667
CSJ-38	1.46667	5.29167	5.94167	3.67667	1.68167	1.88167	13.6333	13.05	7.91667	8.41667	1.245	3.43833	8.63	5.845	0.548333	0.718333	12.6167	18.3833	7.5	8.43333	1.24333	2.14167	3.68667	4.23167	0.418333	0.738333	10.8	8.26667	3.58333	4.31667
CSJ-42	0.946667	1.87667	4.80833	3.66667	0.515	0.758333	16.15	14.1167	8.91667	9.41667	1.655	1.99167	14.54	7.33167	0.58	0.62	7.81667	7.8	3.78333	3.48333	2.115	2.25333	3.555	3.205	0.551667	1.555	4.96667	5.75	3.18333	2.38333
CSJ-43	0.916667	1.40833	4.29333	3.32	0.626667	1.08	17.7833	15.7667	7.71667	10.5667	1.69167	1.77833	13.1767	5.53167	0.41	0.42	11.8167	9.8	3.95	2.43333	1.57167	2.13	4.285	3.65833	0.4	0.591667	15.0667	11.2833	3.98333	3.68333
CSJ-47	1.20167	3.85167	3.21667	2.795	0.935	1.26833	13.6667	13.5	9.31667	9.23333	1.98667	3.04667	12.13	7.95333	0.42	0.526667	16.7833	11.2667	9.1	8.48333	1.41833	2.405	2.425	3.84167	0.468333	0.541667	8.98333	10.2	2.08333	4.53333
CSJ-45	0.936667	4.805	3.52667	2.72	1.005	1.03333	26.9833	11.3333	9.21667	8.95	1.43333	2.955	8.97833	6.78833	0.503333	0.531667	6.41667	8.8	4.9	5.23333	1.9	2.335	4.42167	3.95833	0.508333	0.69	17.6833	11.2667	4.08333	3.28333
Mean	1.40358	3.51975	4.03742	3.211	0.824417	1.17658	17.0125	15.4775	7.66583	8.16083	1.68983	2.65692	8.95433	6.49767	0.481417	0.730917	11.2808	12.215	5.41917	5.65333	1.624	2.25583	3.62075	3.57942	0.511333	0.715	14.1	11.5892	3.8675	3.83833
Polyembryonic types
CSJ-1	1.31	3.93333	4.65	4.32833	1.03833	1.23833	12.9333	12.7167	6.7	7.01667	1.515	3.94	6.73333	6.16667	0.221667	0.37	15.1833	15.4667	7.08333	7.08333	1.785	3.80167	3.965	4.25167	0.846667	1.18	9.13333	12.4	3.23333	4.43333
CSJ-3	2.22667	2.64833	4.29	3.68	1.70833	2.46833	30.1667	17.8167	8.7	7.13333	1.63167	3.17	7.49667	8.27	0.0883333	0.211667	8.73333	8.21667	5.4	6.83333	1.61667	2.78667	3.16	3.445	0.376667	0.561667	12.75	12.0833	2.26667	3.06667
CSJ-6	1.49667	2.87333	4.28667	2.61167	1.485	1.54833	28.45	25.1333	8.35	8.75	1.83333	2.44667	8.14667	7.045	0.481667	1.23833	9.38333	16.9167	3.96667	6.13333	1.30667	2.02333	3.45	3.455	0.573333	0.651667	18.05	21.7333	3.28333	3.61667
CSJ-7	1.265	2.885	3.88	3.35667	1.82667	2.62667	26.5667	27.4333	8.41667	8.36667	1.8	1.82	8.655	6.46	0.396667	0.501667	7.06667	10.4	4.46667	4.03333	1.92333	2.73	3.36167	3.15	0.543333	0.711667	16.1333	20.3667	3.88333	4.18333
CSJ-8	1.415	2.85833	3.78167	3.26167	1.16667	2.30333	24.45	18.8167	7.98333	7.11667	2.06833	3.25667	10.2917	9.93833	0.425	0.688333	8.8	13.3333	6.38333	7.58333	1.60667	2.88833	3.35333	3.60667	0.555	0.708333	10.4333	17.9833	2.73333	3.46667
CSJ-9	1.25	3.415	4.27333	2.81	1.98	3.01667	18.4833	16.4667	7.73333	7.28333	2.10667	2.70333	7.93833	6.35	0.511667	0.593333	11.5333	12.1833	5.66667	5.63333	1.88167	2.06833	3.15833	2.96167	0.583333	0.621667	15.0333	14.1833	2.98333	1.71667
CSJ-10	1.52	2.89	4.11667	2.86833	0.606667	1.84833	19.3	21.0833	7.61667	8.1	1.44	2.26167	5.965	8.23833	0.196667	0.323333	9.76667	14.1	4.16667	7.08333	1.40833	2.72167	3.58333	3.18667	0.551667	0.778333	13.2333	23.1167	3.43333	4.16667
CSJ-11	1.51333	3.445	4.89	4.21167	1.755	2.01667	22.9667	18.8333	8.08333	8.03333	2.01333	2.08	12.5617	7.265	0.885	0.918333	7.36667	4.13333	6.73333	3.23333	1.665	3.05167	4.21	4.10667	0.571667	0.635	24.1333	17.25	4.36667	3.66667
CSJ-13	1.185	1.85833	4.11167	3.90167	0.818333	1.18167	11.3667	13.2333	6.06667	6.61667	1.62667	2.515	10.1417	8.09333	0.685	1.42333	13.4167	14.1667	6.43333	7.28333	1.62333	2.07667	3.13	3.59	0.526667	0.558333	13.6667	17.4	2.58333	2.93333
CSJ-14	0.706667	2.39833	2.74333	2.62	0.745	0.861667	17.2667	17.9667	7.36667	8.41667	1.71	2.82333	6.47667	5.755	0.668333	1.16833	8.86667	9.41667	5.51667	6.08333	1.55833	2.58167	3.28667	3.17167	0.51	0.655	15.5167	15.0167	2.93333	3.98333
CSJ-17	0.948333	3.16167	3.19667	2.74833	0.87	1.075	14.75	13.3833	6.8	7.3	1.68167	2.89167	10.2217	6.51667	0.515	0.641667	13.0833	11.2167	8.31667	6.48333	1.86	2.29667	3.66167	2.79167	0.451667	0.618333	19.6	19.0167	4.43333	2.68333
CSJ-19	1.31333	3.12	5.00667	4.39667	1.53333	2.44833	15.25	13.8833	7.75	7.68333	1.575	2.06167	6.41	6.04167	0.658333	0.666667	6.9	7.41667	4.23333	4.68333	1.30333	1.89667	2.82667	3.02167	0.323333	0.466667	11.1333	17.7167	2.53333	3.43333
CSJ-22	0.715	3.87	4.43	4.13833	0.285	0.451667	20.3833	17.9	8.38333	9.23333	2.70667	4.635	7.915	7.88167	0.988333	1.41833	14.15	25.35	7.38333	9.78333	1.55667	3.16333	4.27167	3.88167	0.625	0.666667	12.7667	17.1333	4.98333	4.86667
CSJ-23	0.795	4.85333	4.29167	4.12667	0.273333	0.353333	26.2167	33.15	8.25	9.8	1.63667	1.935	7.90667	6.385	0.566667	0.641667	12.2	13.2	6.38333	5.13333	1.68333	1.99	4.09833	3.20667	0.55	0.64	14.8167	7.73333	5.28333	3.36667
CSJ-24	0.575	2.555	6.675	5.60667	0.285	0.348333	25.6333	31.5833	7.4	8.76667	1.89	2.17333	6.185	5.44	0.768333	0.893333	14.9	9.78333	5.73333	5.83333	1.15667	1.66333	4.18	3.14833	0.58	0.663333	18.25	12.7667	4.03333	3.26667
CSJ-25	0.686667	2.63167	3.84667	3.26333	0.32	0.353333	30.6833	31.2167	8.4	10.0333	1.52167	2.2	7.82167	5.90833	0.566667	0.68	10.6667	18.6667	6.63333	6.43333	1.32	1.65	4.23833	3.78833	0.625	0.801667	14.0667	16.6833	4.83333	3.86667
CSJ-26	1.32833	2.43667	5.625	5.07167	0.561667	1.87333	15.5833	17.7333	7.2	7.5	2.81833	3.305	8.23667	7.62167	0.76	0.89	13.1333	10.3667	7.23333	5.53333	2.02167	2.115	3.25	3.46333	0.621667	0.778333	13.4	9.23333	2.73333	2.81667
CSJ-27	1.51833	5.77	6.145	4.335	0.408333	0.446667	12.95	11.35	5.35	5	1.62167	2.18333	6.53667	6.98833	0.591667	2.06333	6.86667	7.86667	4.58333	5.48333	1.16833	2.35	3.17333	3.45167	0.386667	0.608333	12.1667	20.65	2.73333	4.11667
CSJ-30	1.14667	3.875	4.90333	3.165	0.925	1.32167	13.9667	15.4333	8.45	9.98333	1.58167	2.48833	8.415	6.29667	0.366667	0.521667	13.9167	15.2167	4.38333	4.08333	1.165	3.63833	4.86833	4.69333	0.325	0.42	12.1667	10.6	3.73333	4.33333
CSJ-34	1.27833	4.625	5.11	2.85167	1.31667	2.095	12.2667	14.0333	7.33333	8.4	1.91	3.86833	7.08	5.195	0.731667	0.828333	15.1333	11.2	6.23333	5.63333	1.81833	2.42833	3.84667	3.49833	0.408333	1.00833	6.43333	9.85	3.08333	3.73333
CSJ-36	2.42333	5.935	5.505	4.61667	2.07667	4.4	11.8	12.4167	5.55	5.5	1.37333	1.41833	11.2967	7.09	0.358333	0.435	11.1833	10.25	3.55	2.93333	1.875	1.945	3.67833	3.64333	0.313333	0.453333	13.9667	11.35	3.68333	3.31667
CSJ-37	1.975	5.48167	6.17833	4.92	1.03667	1.24167	12.35	12.3167	5.31667	5.85	1.57667	1.66	10.4483	6.03833	0.351667	0.866667	15.9	8.93333	2.85	3.08333	1.325	2.24333	2.77833	3.80167	0.438333	0.486667	6.3	14.6667	3.53333	3.81667
CSJ-39	0.898333	2.70667	3.84333	2.66833	0.451667	0.78	19.75	18.3	7.45	8.65	2.00167	4.115	11.205	8.40333	0.275	0.393333	10.1167	22.7	7.13333	7.28333	1.86333	3.86333	4.89167	4.34167	0.716667	0.78	12.7	22.5667	4.88333	6.13333
CSJ-40	0.658333	1.44667	5.49833	4.91333	0.521667	0.573333	14.0667	19	6.53333	7.88333	1.77833	2.09333	7.4	7.93833	0.29	0.883333	4.4	16.4667	2.53333	4.58333	1.92667	2.32	4.315	4.75	0.763333	0.783333	8.7	14.7833	3.78333	7.63333
CSJ-41	0.578333	3.59333	4.29	1.78167	0.308333	0.351667	23.75	26.7	7.58333	8.75	2.35167	4.125	11.7517	8.38	0.46	0.626667	10.2	18.1833	6.43333	7.18333	1.72333	2.35	4.04333	2.83333	0.41	0.601667	5.46667	12.75	3.13333	3.58333
CSJ-44	0.87	2.365	3.65167	1.55167	0.633333	0.788333	19.6667	26.2167	6.96667	8.15	1.735	2.895	11.1283	8.07833	0.32	0.573333	14.4333	28.7167	3.85	4.93333	2.75	2.83167	3.42667	3.51	0.678333	0.731667	10.2	9.91667	3.73333	3.18333
CSJ-46	1.24333	3.80333	6.65	4.50167	0.54	0.646667	11.7333	13	6.68333	8	1.67	3.14333	11.2567	8.41	0.32	0.33	13.8333	26.9333	4.8	7.78333	1.11	2.19	2.94833	3.45833	0.34	0.433333	7.35	14.9333	2.78333	4.01667
CSJ-48	0.996667	4.54167	3.96167	2.71667	0.521667	1.03167	31.5333	21.25	10.1167	9.58333	1.94333	3.02167	10.335	5.96667	0.53	0.576667	8.31667	7.9	5.9	5.28333	2.33	2.345	4.45167	4.18167	0.465	0.908333	17.6833	16.2	5.28333	4.23333
Mean	1.20845	3.42774	4.63685	3.60798	0.928512	1.4175	19.4387	19.2274	7.44762	7.96071	1.82565	2.75821	8.78417	7.0772	0.499226	0.763095	11.0518	13.8821	5.4994	5.82619	1.6547	2.50036	3.70024	3.58536	0.523571	0.675417	13.0446	15.3601	3.60357	3.84405
Note: all ion contents are in mg/g dry weight

## Sheet: Supplementary Table 4
Supplementary Table 4 Comparison of monoembryonic (n=20) and polyembryonic (n=28) types for plant biomass traits and mineral ion concentrations under control (C, ECiw 0.7 dS/m) and salinity (S, ECiw 12.0 dS/m) treatments by Welch's independent t-test (p 0.05).
Trait	Trt	Group	Mean	SD	t	DF	p	Hedges' g
LDM	C	M	19.059	2.62	5.77	156.686	<0.001	-0.85
		P	21.167	2.31
	S	M	14.345	2.206	6.26	184.64	<0.001	-0.899
		P	16.528	2.612
SDM	C	M	7.476	2.331	0.605	166.936	0.546ns	-0.088
		P	7.68	2.257
	S	M	5.001	1.408	1.42	185.89	0.158ns	-0.203
		P	5.32	1.703
RDM	C	M	10.649	4.448	1.573	125.321	0.118ns	-0.237
		P	11.54	2.877
	S	M	7.969	2.786	3.86	144.74	<0.001	-0.573
		P	9.414	2.202
PDM	C	M	37.184	7.092	3.295	151.195	0.001	-0.487
		P	40.387	5.949
	S	M	27.314	5.014	5.28	174.47	<0.001	-0.768
		P	31.262	5.228
SRR	C	M	2.79	0.95	1.68	115.75	0.097ns	0.254
		P	2.59	0.54
	S	M	2.59	0.82	2.66	120.81	0.009	0.402
		P	2.39	0.5
Leaf Na+	C	M	1.409	0.676	2.128	130.762	0.035	0.319
		P	1.223	0.465
	S	M	3.539	1.681	0.449	128.34	0.654ns	0.068
		P	3.442	1.125
Leaf K+	C	M	4.044	0.7	3.777	146.98	<0.001	-0.514
		P	4.649	0.984
	S	M	3.228	0.358	3.3	110.13	0.001	-0.518
		P	3.62	1.012
Leaf Cl-	C	M	0.831	0.345	1.667	185.915	0.097ns	-0.234
		P	0.94	0.565
	S	M	1.191	0.491	2.225	173.09	0.027	-0.308
		P	1.429	0.975
Leaf Ca2+	C	M	17.02	6.185	2.641	174.4	0.009	-0.384
		P	19.454	6.445
	S	M	15.5	5.025	4.569	187.686	<0.001	-0.654
		P	19.242	6.307
Leaf Mg2+	C	M	7.671	0.979	1.383	182.764	0.168ns	0.199
		P	7.46	1.127
	S	M	8.176	1.252	1.091	173.636	0.277ns	0.159
		P	7.973	1.294
Stem Na+	C	M	1.696	0.304	2.993	182.151	0.003	-0.432
		P	1.838	0.347
	S	M	2.674	0.846	0.781	166.793	0.436ns	-0.114
		P	2.769	0.818
Stem K+	C	M	8.963	2.571	0.473	140.368	0.637ns	0.07
		P	8.802	1.95
	S	M	6.517	1.22	3.313	163.981	0.001	-0.485
		P	7.094	1.149
Stem Cl-	C	M	0.491	0.203	0.691	176.779	0.490ns	-0.1
		P	0.512	0.217
	S	M	0.742	0.406	0.555	169.256	0.580ns	-0.081
		P	0.775	0.402
Stem Ca2+	C	M	11.285	4.866	0.353	124.747	0.725ns	0.053
		P	11.067	3.127
	S	M	12.23	4.789	2.122	188.174	0.035	-0.303
		P	13.897	6.086
Stem Mg2+	C	M	5.423	1.623	0.383	162.539	0.702ns	-0.056
		P	5.512	1.509
	S	M	5.665	2.073	0.624	142.6	0.534ns	-0.093
		P	5.838	1.606
Root Na+	C	M	1.631	0.255	0.799	189.653	0.425ns	-0.113
		P	1.667	0.373
	S	M	2.269	0.372	3.505	187.616	<0.001	-0.493
		P	2.512	0.587
Root K+	C	M	3.626	0.475	1.124	186.846	0.263ns	-0.161
		P	3.712	0.585
	S	M	3.592	0.57	0.074	160.033	0.941ns	-0.011
		P	3.598	0.518
Root Cl-	C	M	0.517	0.16	0.803	156.697	0.423ns	-0.118
		P	0.535	0.141
	S	M	0.729	0.242	1.322	135.893	0.188ns	0.198
		P	0.687	0.175
Root Ca2+	C	M	14.105	5.412	1.441	144.632	0.152ns	0.214
		P	13.057	4.274
	S	M	11.604	3.696	6.601	181.27	<0.001	-0.953
		P	15.373	4.168
Root Mg2+	C	M	3.87	2.211	0.985	97.752	0.327ns	0.152
		P	3.613	0.898
	S	M	3.848	1.906	0.025	115.922	0.980ns	-0.004
		P	3.854	1.093
Note: LDM- leaf dry mass (g/plant), SDM- stem dry mass (g/plant), RDM- root dry mass (g/plant), PDM- plant dry mass (g/plant), SRR- shoot to root ratio
LNa- Leaf Na, LK- leaf K, LCa- leaf Ca, LMg- leaf Mg, SNa- stem Na, SK- stem K, SCa- stem Ca, SMg- stem Mg,
RNa- root Na, RK- root K, RCa- root Ca, RMg- root Mg. All ion concentartions are in mg/g.

## Sheet: Supplementary Table 5
Supplementary Table 5
Pearson's correlation coefficients and the associated p-values between the measuredtraits in monoembryonic and polyembryonic types.
		Monoembryonic		Polyembryonic
Trait	Trait	r	p	r	p
LDM	SDM	0.756694	0	0.680325	0
LDM	RDM	0.335649	1.43181e-05	0.506105	4.44089e-16
SDM	RDM	0.512674	4.19176e-12	0.581383	0
LDM	PDM	0.816765	0	0.881347	0
SDM	PDM	0.87147	0	0.863039	0
RDM	PDM	0.792853	0	0.807486	0
LDM	LNa	-0.492025	3.90539e-11	-0.622204	0
SDM	LNa	-0.425602	2.01886e-08	-0.422017	4.35918e-11
RDM	LNa	-0.476669	1.86913e-10	-0.48066	2.37588e-14
PDM	LNa	-0.573075	2.44249e-15	-0.61154	0
LDM	LK	0.389021	3.69763e-07	0.392194	1.1838e-09
SDM	LK	0.2588	0.000951805	0.400631	4.80751e-10
RDM	LK	0.281983	0.000303306	0.202444	0.00233041
PDM	LK	0.383101	5.7332e-07	0.39015	1.46707e-09
LNa	LK	-0.412941	5.74583e-08	-0.26446	6.13617e-05
LDM	LCl	-0.190246	0.0159688	-0.354148	5.08376e-08
SDM	LCl	-0.217107	0.00582188	-0.233814	0.000417344
RDM	LCl	-0.180145	0.0226378	-0.411446	1.45856e-10
PDM	LCl	-0.234761	0.00280711	-0.398901	5.79521e-10
LNa	LCl	0.102439	0.1974	0.390409	1.42787e-09
LK	LCl	-0.021607	0.786238	-0.125423	0.060922
LDM	LCa	0.255915	0.00108968	-0.0781746	0.243918
SDM	LCa	0.138799	0.0800498	-0.0641775	0.339005
RDM	LCa	0.200343	0.0110823	0.0383774	0.567744
PDM	LCa	0.250308	0.00141132	-0.0425361	0.526507
LNa	LCa	-0.314542	5.10473e-05	-0.16384	0.0140875
LK	LCa	0.00668247	0.933163	-0.253575	0.000124631
LCl	LCa	-0.163033	0.0394126	-0.216481	0.00111169
LDM	LMg	-0.118096	0.136935	-0.113271	0.090789
SDM	LMg	0.0290996	0.714906	-0.100005	0.13567
RDM	LMg	0.0936724	0.238727	-0.0827497	0.217325
PDM	LMg	0.00458477	0.954116	-0.11695	0.0807138
LNa	LMg	-0.134625	0.0896457	0.0087558	0.896318
LK	LMg	-0.0374063	0.638633	-0.422866	3.94915e-11
LCl	LMg	0.146693	0.064167	-0.183882	0.00577539
LCa	LMg	0.233009	0.00302518	0.668084	0
LDM	SNa	-0.424947	2.13335e-08	-0.462425	2.87326e-13
SDM	SNa	-0.417917	3.82865e-08	-0.504407	8.88178e-16
RDM	SNa	-0.31688	4.4547e-05	-0.223218	0.000766294
PDM	SNa	-0.46217	7.64578e-10	-0.464367	2.21823e-13
LNa	SNa	0.403673	1.20277e-07	0.395393	8.43642e-10
LK	SNa	-0.307511	7.63684e-05	-0.436946	7.36122e-12
LCl	SNa	0.413964	5.28873e-08	-0.0231964	0.729887
LCa	SNa	-0.125368	0.1142	-0.0396601	0.554863
LMg	SNa	-0.0611763	0.442203	0.300799	4.57581e-06
LDM	SK	0.332921	1.69651e-05	0.269473	4.38158e-05
SDM	SK	0.294713	0.000154953	0.0967075	0.149113
RDM	SK	0.451243	2.11819e-09	0.0876218	0.191355
PDM	SK	0.454063	1.63395e-09	0.190979	0.00412075
LNa	SK	-0.494593	2.98273e-11	-0.430058	1.6906e-11
LK	SK	0.446762	3.18407e-09	0.148009	0.0267593
LCl	SK	0.0325856	0.682499	-0.0972324	0.146908
LCa	SK	-0.000712041	0.99287	-0.0139521	0.835496
LMg	SK	0.149503	0.0591782	-0.194626	0.00344874
SNa	SK	-0.26548	0.000691689	-0.147356	0.0274449
LDM	SCl	-0.169183	0.0324616	-0.265931	5.56241e-05
SDM	SCl	-0.0951233	0.231499	-0.25414	0.00012022
RDM	SCl	-0.121155	0.12698	-0.124564	0.0627268
PDM	SCl	-0.16081	0.0422152	-0.254048	0.000120929
LNa	SCl	0.616998	0	0.309733	2.28452e-06
LK	SCl	-0.280478	0.0003277	-0.0532063	0.428113
LCl	SCl	-0.16526	0.036763	-0.132674	0.0473289
LCa	SCl	0.0500309	0.529822	-0.0821156	0.220882
LMg	SCl	-0.139859	0.0777485	-0.0342421	0.610212
SNa	SCl	0.0155896	0.844876	0.26284	6.83188e-05
SK	SCl	-0.360741	2.78542e-06	-0.231839	0.000468388
LDM	SCa	0.0155888	0.844884	-0.187448	0.00488123
SDM	SCa	0.0173826	0.827299	-0.325913	6.12055e-07
RDM	SCa	-0.0714508	0.369265	-0.0218831	0.744634
PDM	SCa	-0.0239802	0.763419	-0.200929	0.00251716
LNa	SCa	-0.0321543	0.686479	0.105295	0.116073
LK	SCa	-0.120258	0.12984	-0.24	0.000288932
LCl	SCa	0.061088	0.442863	-0.260535	7.95096e-05
LCa	SCa	0.0450992	0.571203	6.39027e-05	0.999241
LMg	SCa	0.0364092	0.64761	0.19606	0.00321291
SNa	SCa	0.0701863	0.377819	0.470074	1.02807e-13
SK	SCa	-0.0377723	0.635351	0.0580075	0.387562
SCl	SCa	0.0901861	0.256735	0.0269807	0.687961
LDM	SMg	-0.0308219	0.698826	-0.100805	0.132553
SDM	SMg	-0.22812	0.00371686	-0.343102	1.38591e-07
RDM	SMg	-0.229515	0.00350626	-0.0547342	0.41495
PDM	SMg	-0.194206	0.0138649	-0.178435	0.00742522
LNa	SMg	0.280461	0.000327982	-0.0938748	0.161446
LK	SMg	-0.13644	0.0853656	-0.286998	1.27998e-05
LCl	SMg	0.218412	0.00552625	-0.275342	2.92855e-05
LCa	SMg	0.0918687	0.24793	0.0949363	0.156738
LMg	SMg	-0.138236	0.0812924	0.243757	0.000230026
SNa	SMg	0.252765	0.00126099	0.541479	0
SK	SMg	0.0576092	0.469316	0.139884	0.036423
SCl	SMg	0.343956	8.4576e-06	0.204704	0.00207518
SCa	SMg	0.387309	4.20149e-07	0.418094	6.85838e-11
LDM	RNa	-0.388468	3.85387e-07	-0.479088	2.9754e-14
SDM	RNa	-0.201966	0.0104339	-0.444862	2.76534e-12
RDM	RNa	-0.0694015	0.383189	-0.295756	6.70502e-06
PDM	RNa	-0.260089	0.000895499	-0.480875	2.30926e-14
LNa	RNa	0.303928	9.34057e-05	0.493298	3.9968e-15
LK	RNa	-0.565723	6.43929e-15	-0.504316	8.88178e-16
LCl	RNa	0.144681	0.0679471	0.186988	0.00498918
LCa	RNa	0.0604715	0.447488	-0.0917412	0.17123
LMg	RNa	0.379996	7.1917e-07	0.214533	0.00123547
SNa	RNa	0.265203	0.000701033	0.658321	0
SK	RNa	-0.342248	9.43588e-06	-0.122165	0.0679996
SCl	RNa	0.339205	1.14505e-05	0.118083	0.077801
SCa	RNa	0.18835	0.0170715	0.318267	1.15156e-06
SMg	RNa	-0.0374402	0.638329	0.181674	0.00639973
LDM	RK	0.101306	0.202428	0.186623	0.0050764
SDM	RK	0.278045	0.00037098	0.140677	0.035365
RDM	RK	0.150236	0.0579292	0.134427	0.0444528
PDM	RK	0.199326	0.0115063	0.184216	0.00568582
LNa	RK	0.00332435	0.966722	-0.160795	0.0160054
LK	RK	0.032121	0.686786	0.0649098	0.333511
LCl	RK	-0.024798	0.755602	-0.236552	0.000355078
LCa	RK	-0.0471485	0.553824	0.0523266	0.435799
LMg	RK	0.188141	0.0171967	0.239292	0.000301497
SNa	RK	-0.256155	0.00107756	0.014487	0.829285
SK	RK	-0.0676006	0.395684	0.130268	0.051527
SCl	RK	-0.216065	0.0060678	-0.0298605	0.656674
SCa	RK	0.0411427	0.605465	0.0677053	0.313066
SMg	RK	-0.367101	1.79814e-06	0.0602612	0.369357
RNa	RK	0.220679	0.00504477	0.195581	0.00329
LDM	RCl	-0.34478	8.02065e-06	-0.311373	2.00605e-06
SDM	RCl	-0.242119	0.00203822	-0.34649	1.02315e-07
RDM	RCl	-0.0664778	0.403596	-0.102064	0.127761
PDM	RCl	-0.251534	0.00133441	-0.296378	6.39863e-06
LNa	RCl	0.060819	0.444878	0.238079	0.00032422
LK	RCl	-0.261742	0.000827806	-0.344824	1.18834e-07
LCl	RCl	0.0533579	0.502784	-0.0295596	0.659917
LCa	RCl	-0.0267923	0.736643	0.131061	0.0501091
LMg	RCl	0.127221	0.108904	0.207274	0.00181604
SNa	RCl	0.39937	1.68228e-07	0.515874	0
SK	RCl	-0.287428	0.000228452	-0.297813	5.74235e-06
SCl	RCl	-0.0140666	0.859867	0.109228	0.102995
SCa	RCl	-0.116814	0.141277	0.165157	0.0133225
SMg	RCl	-0.101013	0.203745	0.242554	0.000247548
RNa	RCl	0.375598	9.87409e-07	0.494569	3.10862e-15
RK	RCl	-0.149571	0.0590605	0.203921	0.00216057
LDM	RCa	0.357697	3.42303e-06	-0.17359	0.00923276
SDM	RCa	0.307957	7.44625e-05	-0.0747921	0.264986
RDM	RCa	0.125038	0.115163	-0.118125	0.0776949
PDM	RCa	0.30547	8.56766e-05	-0.150695	0.0240913
LNa	RCa	-0.184843	0.0192856	0.137274	0.0400949
LK	RCa	-0.176383	0.0256735	-0.312167	1.88317e-06
LCl	RCa	-0.238849	0.00235252	0.13279	0.0471334
LCa	RCa	0.0840881	0.290432	0.162587	0.014851
LMg	RCa	-0.268795	0.000588573	0.158998	0.0172411
SNa	RCa	-0.375145	1.01991e-06	0.134869	0.0437518
SK	RCa	-0.171303	0.0303205	-0.0363972	0.587904
SCl	RCa	0.0171442	0.829632	0.339293	1.9412e-07
SCa	RCa	0.148624	0.0607037	-0.00338438	0.959828
SMg	RCa	0.0135269	0.865192	0.27967	2.16302e-05
RNa	RCa	0.0643568	0.418796	0.23741	0.00033742
RK	RCa	0.116836	0.141201	0.0513725	0.444226
RCl	RCa	-0.14724	0.063171	0.138747	0.0379859
LDM	RMg	0.0319149	0.688691	0.163471	0.0143086
SDM	RMg	0.0935746	0.23922	0.100133	0.13517
RDM	RMg	-0.0400406	0.615169	0.132858	0.0470191
PDM	RMg	0.0208537	0.793521	0.159741	0.0167208
LNa	RMg	0.1303	0.100534	-0.0268865	0.688994
LK	RMg	-0.224349	0.00434429	-0.0786191	0.24124
LCl	RMg	-0.274599	0.000441423	-0.297601	5.83497e-06
LCa	RMg	-0.0595996	0.454077	0.161319	0.01566
LMg	RMg	-0.125316	0.114349	0.281248	1.93435e-05
SNa	RMg	-0.241564	0.00208872	0.158133	0.0178651
SK	RMg	-0.281767	0.000306704	0.0931448	0.164746
SCl	RMg	0.0780475	0.326598	0.115068	0.0857501
SCa	RMg	0.133215	0.0930866	0.230764	0.000498518
SMg	RMg	-0.0913937	0.250394	0.178156	0.00751991
RNa	RMg	0.179916	0.0228133	0.32632	5.91508e-07
RK	RMg	0.294676	0.000155259	0.648153	0
RCl	RMg	0.060537	0.446996	0.28651	1.32602e-05
RCa	RMg	0.559861	1.39888e-14	0.321352	8.94202e-07
Note: LDM- leaf dry mass (g/plant), SDM- stem dry mass (g/plant), RDM- root dry mass (g/plant), PDM- plant dry mass (g/plant),
LNa- Leaf Na, LK- leaf K, LCa- leaf Ca, LMg- leaf Mg, SNa- stem Na, SK- stem K, SCa- stem Ca, SMg- stem Mg,
RNa- root Na, RK- root K, RCa- root Ca, RMg- root Mg. All ion concentartions are in mg/g.

## Sheet: Supplementary Table 6
Supplementary Table 6
Loading of variables and variance explained by the first two linear discriminant functions
Variable	LD1	LD2
LDM	0.14279	0.26644
SDM	0.028743	-0.22098
RDM	-0.060206	0.096098
LNa	-0.58145	0.2522
LK	0.10766	0.64301
LCl	-0.56931	0.44873
LCa	0.0025092	0.10427
LMg	-0.29989	-0.20934
SNa	-0.59668	0.3914
SK	0.16786	0.0099631
SCl	-1.0504	0.015463
SCa	-0.066123	0.039472
SMg	0.20892	-0.11874
RNa	-0.84991	0.87211
RK	0.25808	0.0071161
RCl	-1.4751	-0.25074
RCa	-0.011498	0.092137
RMg	0.02891	-0.15517
Eigen value	5.23	0.74
Variance (%)	86.04	12.11
Note: LDM- leaf dry mass (g/plant), SDM- stem dry mass (g/plant), RDM- root dry mass (g/plant), PDM- plant dry mass (g/plant),
LNa- Leaf Na, LK- leaf K, LCa- leaf Ca, LMg- leaf Mg, SNa- stem Na, SK- stem K, SCa- stem Ca, SMg- stem Mg,
RNa- root Na, RK- root K, RCa- root Ca, RMg- root Mg. All ion concentartions are in mg/g.

## Sheet: Supplementary Table 7
Supplementary Table 7
Confusion matrix for predicted group membership from discriminant analysis
Group	M_C	M_S	P_C	P_S	Total
Monoembryonic control (M_C)	75	0	25	0	100
Monoembryonic saline (M_S)	0	81.25	0	18.75	100
Polyembryonic control (P_C)	19.64	0	80.36	0	100
Polyembryonic saline (P_S)	0	13.39	3.57	83.04	100
Rows refer to the given groups, and columns to the predicted groups. Overall, 80.21% of the estimates (jacknifed) were correctly classified.
