# Supplementary material for: Similar and divergent responses to salinity stress of jamun (Syzygium cumini L. Skeels) genotypes
Source: PeerJ. 2024 May 14;12:e17311. doi: 10.7717/peerj.17311 (PMC11100480; doi:10.7717/peerj.17311)
Supplement: Supplemental Information 2 [file peerj-12-17311-s002.xlsx]

## Sheet: raw_data
Gen	Trt	Type	Group	LDM	SDM	RDM	PDM	LNa	LK	LCl	LCa	LMg	SNa	SK	SCl	SCa	SMg	RNa	RK	RCl	RCa	RMg
CSJ-31	C	M	M_C	22.13	9.15	6.16	37.44	1.26	4.3	1.11	14.35	8.5	1.59	10.91	0.305	25	4.65	1.58	3.65	0.13	10.45	2.6
CSJ-31	C	M	M_C	18.79	8.8	5	32.59	1.19	4.25	1.11	14.75	7.96	1.615	11.405	0.32	24.01	5.16	1.59	3.64	0.14	10.9	2.85
CSJ-31	C	M	M_C	20.86	8.55	6.36	35.77	1.32	4.405	1.2	13.71	8.85	1.64	10.77	0.275	25.7	4.35	1.525	3.73	0.1	9.72	2.35
CSJ-31	C	M	M_C	18.71	9.04	5.98	33.73	1.31	4.35	1.19	14.32	8.36	1.53	11.11	0.34	25.02	4.77	1.61	3.71	0.15	10.26	2.73
CSJ-32	C	M	M_C	20.07	10.15	11	41.22	1.105	3.215	0.535	13.45	7.95	1.195	7.215	0.215	17.7	4.25	1.915	3.72	0.79	29.15	12.8
CSJ-32	C	M	M_C	21.95	10.65	9.68	42.28	1.085	3.305	0.52	14.15	7.5	1.165	6.785	0.255	16.36	4.49	1.96	3.81	0.74	29.65	13.1
CSJ-32	C	M	M_C	19.62	9.01	9.36	37.99	1.12	3.15	0.51	12.66	8.1	1.16	6.99	0.19	18.55	3.95	1.85	3.61	0.81	28.81	12.55
CSJ-32	C	M	M_C	22.21	9.22	10.58	42.01	1.14	3.17	0.57	13.34	7.92	1.11	7.08	0.23	17.59	4.31	1.96	3.77	0.81	29.26	12.88
CSJ-33	C	M	M_C	14.73	7.85	12.35	34.93	1.54	2.965	0.57	10.05	5.35	1.68	4.615	0.62	9.24	3.6	2	4.12	0.535	16.8	4.05
CSJ-33	C	M	M_C	16.58	6.95	10.14	33.67	1.57	3.045	0.56	9.45	5.7	1.52	5.41	0.68	9.9	3.9	2.18	4.265	0.57	17.49	4.33
CSJ-33	C	M	M_C	16.31	6.8	12.69	35.8	1.46	3.12	0.545	10.43	5	1.68	4.775	0.58	8.25	3.35	1.98	4.04	0.49	16.3	3.8
CSJ-33	C	M	M_C	17.42	7.12	11.03	35.57	1.58	3	0.61	10	5.42	1.71	5.02	0.59	9.08	3.55	2.11	4.09	0.56	16.94	4.15
CSJ-35	C	M	M_C	18.13	5.61	7.16	30.9	3.83	3.8	0.49	13.55	6.8	1.755	7.79	0.62	10.05	6.6	1.49	3.66	0.325	15.05	3.95
CSJ-35	C	M	M_C	21.12	5.4	5.99	32.51	3.66	4.005	0.555	14.16	6.6	1.86	7.98	0.53	9.45	6.87	1.595	3.79	0.315	15.7	4.3
CSJ-35	C	M	M_C	18.21	5.85	6.23	30.29	4.015	3.71	0.48	13	7.11	1.74	8.195	0.68	10.59	6.3	1.43	3.58	0.32	14.2	3.66
CSJ-35	C	M	M_C	19.79	6	6.51	32.3	3.92	3.91	0.54	13.62	6.89	1.84	8.07	0.64	10.11	6.63	1.55	3.74	0.36	15.12	4.02
CSJ-42	C	M	M_C	17.59	8.03	16.36	41.98	0.97	4.825	0.47	16.2	9.2	1.58	14.03	0.585	7.9	3.75	2.1	3.44	0.55	4.95	3.12
CSJ-42	C	M	M_C	18.12	7.8	19.11	45.03	0.89	4.69	0.54	16.65	9	1.65	14.97	0.63	7.15	4.25	2.19	3.655	0.59	5.55	2.95
CSJ-42	C	M	M_C	16.9	7.5	16.35	40.75	0.955	4.87	0.5	15.52	8.52	1.69	14.575	0.5	8.45	3.52	2.005	3.52	0.485	4.35	3.45
CSJ-42	C	M	M_C	17.8	8.35	17.14	43.29	0.98	4.85	0.56	16.23	8.95	1.71	14.59	0.61	7.77	3.61	2.17	3.61	0.58	5.02	3.21
CSJ-43	C	M	M_C	18.75	7.81	26.25	52.81	0.94	4.275	0.59	17.75	7.75	1.64	12.935	0.415	11.9	3.9	1.565	4.3	0.395	15.2	3.95
CSJ-43	C	M	M_C	19.82	8.2	23.69	51.71	0.885	4.33	0.665	18.2	7.3	1.73	13.44	0.475	10.9	4.4	1.63	4.24	0.455	15.86	4.26
CSJ-43	C	M	M_C	17.47	8	24.14	49.61	0.955	4.31	0.595	17.36	8.04	1.645	13.025	0.4	12.61	3.5	1.5	4.355	0.36	14.1	3.7
CSJ-43	C	M	M_C	15.31	8.09	25	48.4	0.89	4.26	0.66	17.82	7.78	1.75	13.31	0.39	11.86	3.99	1.59	4.25	0.39	15.11	4.02
CSJ-38	C	M	M_C	18.58	6.02	10.42	35.02	1.47	5.875	1.69	13.7	8.05	1.105	8.4	0.54	12.65	7.5	1.25	3.685	0.405	10.75	3.55
CSJ-38	C	M	M_C	16.35	6.8	8.69	31.84	1.45	6.04	1.745	13	8	1.39	9.005	0.63	13.7	7.8	1.18	3.77	0.45	11.3	3.9
CSJ-38	C	M	M_C	18.95	6.1	10.66	35.71	1.48	5.91	1.61	14.2	7.7	1.25	8.485	0.475	11.5	7.2	1.29	3.58	0.385	10.35	3.3
CSJ-38	C	M	M_C	19.22	6.8	9.19	35.21	1.43	5.92	1.7	13.65	7.94	1.24	8.66	0.57	12.64	7.48	1.27	3.72	0.44	10.82	3.61
CSJ-20	C	M	M_C	19.96	8.05	8.12	36.13	1.245	4.11	0.725	12.6	8	1.435	9.39	0.57	10.05	5.1	1.285	3.875	0.625	4.6	2.8
CSJ-20	C	M	M_C	18.77	7.48	7.29	33.54	1.165	4.21	0.79	13.3	7.45	1.3	10.01	0.515	10.87	5.65	1.37	3.725	0.56	4.2	3.15
CSJ-20	C	M	M_C	21.16	8.61	7.59	37.36	1.29	4.08	0.685	12.05	8.7	1.245	9.58	0.64	9.1	4.8	1.205	3.99	0.7	5.07	2.55
CSJ-20	C	M	M_C	18.91	7.65	8.33	34.89	1.21	4.09	0.75	12.67	8.07	1.34	9.67	0.59	10.04	5.19	1.31	3.89	0.65	4.66	2.84
CSJ-29	C	M	M_C	19.3	7.55	11.09	37.94	1.53	4.765	0.635	13.5	7.95	1.565	7.66	0.395	11.95	3.45	1.765	4.165	0.365	14.9	3.4
CSJ-29	C	M	M_C	20.4	8.18	9.36	37.94	1.595	4.99	0.59	13.85	7.65	1.645	7.62	0.34	11.15	3.75	1.745	4.315	0.395	15.8	3.72
CSJ-29	C	M	M_C	21.71	8.75	10.75	41.21	1.5	4.61	0.655	12.9	8.45	1.57	7.98	0.42	12.55	3.15	1.805	4.095	0.35	14.4	3.15
CSJ-29	C	M	M_C	20.87	7.6	10.11	38.58	1.55	4.81	0.65	13.44	8.05	1.61	7.81	0.44	11.87	3.47	1.79	4.21	0.37	15.05	3.46
CSJ-28	C	M	M_C	19	6.02	6.23	31.25	2.515	3.665	0.495	14.55	6	2.415	5.825	0.87	13.85	7.95	1.335	2.86	0.625	13.75	2.95
CSJ-28	C	M	M_C	20.92	6.1	5.58	32.6	2.44	3.74	0.525	15.2	6.55	2.29	6.465	0.825	14.7	8.5	1.445	2.85	0.56	14.55	2.75
CSJ-28	C	M	M_C	16.39	5.75	5.12	27.26	2.445	3.605	0.48	14.95	6	2.34	6.045	0.925	13.15	7.5	1.22	2.83	0.695	13	3.22
CSJ-28	C	M	M_C	18.1	5.9	6.01	30.01	2.61	3.69	0.52	14.93	6.16	2.41	6.14	0.85	13.92	8	1.32	2.95	0.65	13.79	3.01
CSJ-4	C	M	M_C	16.51	6.19	12.32	35.02	1.34	3.74	1.265	17.05	7.1	1.685	12.99	0.225	5.9	6.6	1.47	3.58	0.51	10.45	2.5
CSJ-4	C	M	M_C	16.16	6.4	10.98	33.54	1.405	4.005	1.28	18	6.5	1.72	13.26	0.255	6.52	5.5	1.59	3.505	0.575	9.45	2.2
CSJ-4	C	M	M_C	20.46	6.04	10.85	37.35	1.265	3.645	1.18	17.3	7.52	1.6	12.545	0.2	5.2	6.62	1.455	3.655	0.45	11.15	3
CSJ-4	C	M	M_C	19.9	5.82	11.47	37.19	1.36	3.81	1.31	17.47	7.08	1.71	12.94	0.23	5.91	6.35	1.55	3.56	0.53	10.35	2.59
CSJ-5	C	M	M_C	18.3	4.65	8.7	31.65	1.645	3.32	1.38	21.35	7.45	1.59	7.59	0.14	5.25	5.15	1.5	3.61	0.56	16.05	3.2
CSJ-5	C	M	M_C	19.57	5.58	9.12	34.27	1.58	3.11	1.425	22	7	1.61	7.965	0.15	6.1	4.25	1.59	3.68	0.615	16.6	2.8
CSJ-5	C	M	M_C	15.87	4.7	9	29.57	1.61	3.435	1.33	21.1	8.05	1.62	7.7	0.175	4.9	5.45	1.44	3.545	0.525	14.9	3.4
CSJ-5	C	M	M_C	18.89	4.84	7.99	31.72	1.66	3.31	1.39	21.5	7.51	1.52	7.76	0.18	5.43	4.97	1.46	3.63	0.58	15.87	3.14
CSJ-12	C	M	M_C	17.02	6.2	12.35	35.57	1.07	4.3	0.5	21.15	7.25	1.69	6.455	0.405	8.25	3.95	1.4	3.455	0.46	14.95	3.25
CSJ-12	C	M	M_C	16.95	5.7	10.02	32.67	1.045	4.465	0.585	22	7	1.88	6.75	0.37	9.3	3.05	1.55	3.61	0.44	15.7	2.85
CSJ-12	C	M	M_C	18.55	5.3	10	33.85	1.11	4.255	0.46	21.4	7.65	1.77	6.58	0.455	7.55	4.75	1.305	3.57	0.505	14.05	3.7
CSJ-12	C	M	M_C	15.99	6	11.47	33.46	1.06	4.36	0.53	21.53	7.31	1.79	6.61	0.42	8.38	3.93	1.44	3.56	0.49	14.91	3.33
CSJ-2	C	M	M_C	16.46	5.3	6.07	27.83	1.215	4.895	0.885	13.8	7.9	2.165	8.55	0.14	5.8	3.75	1.895	3.585	0.82	12.85	4.7
CSJ-2	C	M	M_C	17.15	5.7	7.14	29.99	1.28	5.03	0.85	15	8.5	2.135	8.915	0.175	6.45	4.3	1.905	3.805	0.9	14.1	5.05
CSJ-2	C	M	M_C	18.56	5.2	6.39	30.15	1.17	4.745	0.905	13.3	7.35	2.09	9.075	0.13	5.1	3.45	1.82	3.68	0.735	12.15	4.45
CSJ-2	C	M	M_C	17.79	5.35	5.68	28.82	1.18	4.91	0.87	14.05	7.93	2.08	8.86	0.16	5.77	3.84	1.88	3.71	0.83	13.04	4.74
CSJ-21	C	M	M_C	19.34	6.2	10.58	36.12	0.675	3.97	0.3	37.4	7.7	1.955	5.62	0.525	17.7	6.3	1.51	3.57	0.64	10.05	4.9
CSJ-21	C	M	M_C	20.38	6.25	8.39	35.02	0.645	4.08	0.355	40.05	7.2	1.975	6.47	0.58	18.55	6.85	1.63	3.815	0.6	10.7	4.7
CSJ-21	C	M	M_C	20.04	7.15	11.25	38.44	0.72	4.01	0.31	37.55	8.05	2.09	6.175	0.5	17.05	5.85	1.405	3.665	0.7	9.45	5.2
CSJ-21	C	M	M_C	20.36	7	11.54	38.9	0.69	4.03	0.36	38.34	7.67	2.02	6.11	0.55	17.78	6.35	1.53	3.71	0.66	10.09	4.94
CSJ-15	C	M	M_C	21.61	11.07	15.63	48.31	1.19	3.985	0.85	14.95	7.35	2	7.41	0.715	9.25	5.2	1.81	2.98	0.615	16.8	2.25
CSJ-15	C	M	M_C	23.83	10.2	14.02	48.05	1.255	4.075	0.79	15.5	7.45	2.015	7.735	0.795	10	4.3	1.855	3.08	0.55	17.55	2.05
CSJ-15	C	M	M_C	20.15	11.2	13.84	45.19	1.14	4	0.85	15.4	6.95	1.905	7.53	0.65	8.55	6	1.775	2.89	0.68	16	2.55
CSJ-15	C	M	M_C	21.53	11.1	15	47.63	1.265	4.08	0.88	15.3733	7.31	2.03333	7.62833	0.77	9.32667	5.21667	1.86333	3.02333	0.665	16.8433	2.32333
CSJ-16	C	M	M_C	24.01	8.9	9.98	42.89	1.05	3.38	0.865	15.05	7	1.49	9.505	0.705	9.25	6	1.535	3.62	0.47	19.2	3.8
CSJ-16	C	M	M_C	20.24	8.62	10.08	38.94	0.975	3.55	0.895	15.7	7.25	1.28	9.865	0.65	10.5	5.1	1.62	3.705	0.415	19.75	3.6
CSJ-16	C	M	M_C	21.53	9.51	11.89	42.93	0.99	3.275	0.825	15.6	6.65	1.355	9.66	0.78	8.15	6.8	1.555	3.54	0.53	18.4	4.1
CSJ-16	C	M	M_C	21.4	9.45	11.01	41.86	1.075	3.46167	0.911667	15.54	7.02667	1.435	9.74667	0.761667	9.36	6.01667	1.62	3.66167	0.521667	19.1767	3.87333
CSJ-18	C	M	M_C	19.26	7.04	12.02	38.32	1.425	4.12	1.035	16	7.85	1.75	7.27	0.695	10.95	6.85	1.565	3.15	0.365	19.5	2.85
CSJ-18	C	M	M_C	17.39	7.52	10.65	35.56	1.465	4.425	1.095	16.25	8.15	1.905	8.045	0.78	10.15	6.5	1.645	3.26	0.41	20.15	2.45
CSJ-18	C	M	M_C	21.43	6.8	10.39	38.62	1.37	4.05	0.99	16.55	7.55	1.74	7.565	0.64	11.7	7.4	1.505	3.11	0.33	18.9	3.35
CSJ-18	C	M	M_C	17.67	7.3	9.98	34.95	1.49	4.25833	1.09	16.3567	7.91	1.85833	7.69667	0.755	10.9933	6.96667	1.62167	3.21333	0.418333	19.5767	2.92333
CSJ-47	C	M	M_C	22.76	14.21	12.16	49.13	0.945	3.52	0.99	26.55	9.4	1.47	8.61	0.495	6.45	4.85	1.92	4.44	0.52	17.55	4.05
CSJ-47	C	M	M_C	23.44	13.8	13.69	50.93	0.9	3.615	1.075	28.1	8.75	1.43	9.47	0.57	7.05	5.4	1.805	4.305	0.545	17.1	4.4
CSJ-47	C	M	M_C	26.86	13.86	11.56	52.28	0.965	3.445	0.95	26.3	9.5	1.4	8.855	0.445	5.75	4.45	1.975	4.52	0.46	18.4	3.8
CSJ-47	C	M	M_C	25.57	14.52	14.06	54.15	1.00667	3.58667	1.055	27.0733	9.27667	1.49333	9.04833	0.553333	6.47667	4.95	1.95	4.46167	0.558333	17.7433	4.12333
CSJ-45	C	M	M_C	15.54	3.75	6.28	25.57	1.225	3.19	0.97	13.5	9.15	1.855	11.775	0.415	16.85	9.05	1.4	2.425	0.46	9.05	2.05
CSJ-45	C	M	M_C	14.01	3.4	7.13	24.54	1.13	3.325	0.885	14.05	10.05	2.105	12.725	0.385	16.05	9.6	1.54	2.37	0.425	8.15	2.4
CSJ-45	C	M	M_C	12.16	3.8	5.96	21.92	1.25	3.135	0.95	13.45	8.75	2	11.89	0.46	17.45	8.65	1.315	2.48	0.52	9.75	1.8
CSJ-45	C	M	M_C	13.09	3.18	6.45	22.72	1.27167	3.27667	0.985	13.7567	9.37667	2.04667	12.2	0.47	16.8433	9.15	1.46833	2.465	0.518333	9.04333	2.12333
CSJ-31	S	M	M_S	12.6	4.15	4.36	21.11	3.14	3.335	1.21	14.8	9.3	1.66	4.725	0.34	12.35	1.9	2.49	5.195	0.605	12	5.45
CSJ-31	S	M	M_S	12.34	3.98	5	21.32	3.205	3.5	1.255	14.4	10.4	1.45	4.68	0.33	11.2	2.45	2.63	5.44	0.68	12.75	5.75
CSJ-31	S	M	M_S	12.15	4.25	4.89	21.29	3.2	3.265	1.185	14.05	8.55	1.69	4.54	0.355	13.05	1.45	2.605	5.345	0.55	11.5	5.25
CSJ-31	S	M	M_S	13.3	4.65	4.16	22.11	3.25167	3.42667	1.26667	14.5067	9.47667	1.66	4.71833	0.391667	12.26	1.98333	2.625	5.36667	0.661667	12.1433	5.52333
CSJ-32	S	M	M_S	10.56	7.7	6.95	25.21	3.575	3.125	0.78	11.9	7.05	4.245	6.065	0.505	15.05	4.3	1.81	3.595	0.795	7.15	3.45
CSJ-32	S	M	M_S	16	8.35	8.36	32.71	3.715	3.105	0.855	11.3	6.75	4.53	5.935	0.58	14.4	4.85	1.955	3.755	0.855	8.1	3.05
CSJ-32	S	M	M_S	14.8	6.12	6.91	27.83	3.58	3.19	0.74	11.5	7.05	4.5	5.83	0.48	15.8	3.85	1.94	3.605	0.72	6.4	3.75
CSJ-32	S	M	M_S	17.22	6.7	7.14	31.06	3.69333	3.2	0.841667	11.6567	7.01	4.485	6.01333	0.571667	15.1433	4.38333	1.95167	3.69167	0.84	7.27667	3.45667
CSJ-33	S	M	M_S	12.68	3.8	6.38	22.86	4.665	2.8	0.81	11.25	5.6	1.645	4.465	1.155	9.95	5.05	2.16	3.395	0.615	17.95	10.4
CSJ-33	S	M	M_S	10.98	3.75	7.94	22.67	4.805	2.71	0.885	10.7	5	1.695	4.95	1.245	10.75	5.6	2.095	3.545	0.7	18.45	10
CSJ-33	S	M	M_S	13.28	4.26	6.88	24.42	4.71	2.89	0.78	11	5.95	1.805	4.56	1.1	9.1	4.6	2.095	3.44	0.545	17.05	10.7
CSJ-33	S	M	M_S	13.24	4.68	7.06	24.98	4.79667	2.86	0.875	11.0733	5.57667	1.775	4.72833	1.21667	9.99333	5.13333	2.16667	3.5	0.67	17.8767	10.4067
CSJ-35	S	M	M_S	14.5	5.52	6.18	26.2	8.795	3.13	0.56	12.9	7.4	1.9	4.79	1.89	9.65	8	2.065	3.45	0.385	10.45	5.75
CSJ-35	S	M	M_S	16.87	5.02	5.68	27.57	9.015	3.235	0.54	12.2	7	2.175	5.09	1.795	10.55	8.4	2.24	3.59	0.33	9.6	5.35
CSJ-35	S	M	M_S	15.53	6.2	5.98	27.71	9.09	3.09	0.59	13.45	7.6	2.085	5.1	1.955	9.05	7.7	2.13	3.405	0.43	10.8	6.05
CSJ-35	S	M	M_S	13.57	5.39	6.42	25.38	9.03667	3.21167	0.613333	12.94	7.39333	2.11333	5.06333	1.93	9.81	8.08333	2.195	3.52167	0.431667	10.3433	5.75667
CSJ-42	S	M	M_S	14.5	5.15	13.12	32.77	1.88	3.68	0.75	14.65	9.45	1.89	7.27	0.615	7.75	3.45	2.13	3.125	1.55	5.75	2.35
CSJ-42	S	M	M_S	12.76	6.41	12.88	32.05	1.905	3.59	0.815	13.5	9	2.055	7.64	0.7	7.1	3.85	2.37	3.305	1.625	5.25	2.65
CSJ-42	S	M	M_S	12.37	5.8	14.01	32.18	1.845	3.73	0.71	14.2	9.8	2.03	7.085	0.545	8.55	3.15	2.26	3.185	1.49	6.25	2.15
CSJ-42	S	M	M_S	14.35	6.12	12.69	33.16	1.94667	3.72667	0.808333	14.2067	9.47667	2.05167	7.40167	0.67	7.86	3.53333	2.30333	3.245	1.605	5.81	2.42333
CSJ-43	S	M	M_S	14.09	4.98	14.91	33.98	1.375	3.355	1.075	15.85	10.55	1.92	5.475	0.4	9.65	2.4	2.005	3.705	0.59	11.6	3.65
CSJ-43	S	M	M_S	12.77	6.2	13.74	32.71	1.41	3.14	1.115	15.05	11	1.66	5.67	0.43	10.4	2.8	2.23	3.71	0.65	10.2	3.95
CSJ-43	S	M	M_S	13.6	6	12.36	31.96	1.44	3.465	1.05	16.4	10.15	1.755	5.45	0.405	9.35	2.1	2.155	3.56	0.535	12.05	3.45
CSJ-43	S	M	M_S	13.97	5.25	13.25	32.47	1.47833	3.38	1.13	15.8567	10.6267	1.83833	5.60167	0.461667	9.86	2.48333	2.18	3.69833	0.641667	11.3433	3.72333
CSJ-38	S	M	M_S	14.45	5.4	10.75	30.6	5.155	3.69	1.885	13.35	8.55	3.125	5.595	0.73	18.45	8.4	2.08	4.215	0.735	8.35	4.35
CSJ-38	S	M	M_S	14.76	6.04	9.25	30.05	5.5	3.585	1.92	12.55	8.5	3.615	6.17	0.635	19.4	8.95	2.24	4.275	0.7	7.75	3.95
CSJ-38	S	M	M_S	12.52	4.56	8.79	25.87	5.22	3.755	1.84	13.25	8.2	3.575	5.77	0.79	17.3	7.95	2.105	4.205	0.78	8.7	4.65
CSJ-38	S	M	M_S	16.5	4.82	9.12	30.44	5.36167	3.73667	1.93167	13.14	8.47667	3.49833	5.915	0.768333	18.4433	8.48333	2.19167	4.27167	0.788333	8.32667	4.35667
CSJ-20	S	M	M_S	16.04	5.2	6.67	27.91	2.965	3.575	1.7	12.5	8.1	2.69	8.91	0.645	10.3	5.3	2.35	3.795	0.795	14.2	3.4
CSJ-20	S	M	M_S	14.66	4.8	6.51	25.97	3.065	3.455	1.76	12	8.6	2.8	9.4	0.55	9.45	5.85	2.53	3.98	0.8	15.05	3.7
CSJ-20	S	M	M_S	13.55	4.38	5.97	23.9	3	3.665	1.66	12.55	7.75	2.805	8.83	0.71	11.05	4.85	2.5	3.76	0.75	13.15	3.2
CSJ-20	S	M	M_S	15.49	5.3	5.9	26.69	3.08	3.625	1.75667	12.44	8.21	2.825	9.11667	0.685	10.3267	5.38333	2.51	3.885	0.831667	14.1933	3.47333
CSJ-29	S	M	M_S	15.16	6.2	8.74	30.1	2.975	2.86	1.06	13.8	9.05	1.99	6.19	0.565	9.8	2.8	2.32	3.95	0.52	8.3	3.7
CSJ-29	S	M	M_S	8.8	6.4	7.59	22.79	3.07	2.72	1.1	14.1	9.6	1.585	6.16	0.64	10.55	3.35	2.435	4.08	0.565	7.35	3.3
CSJ-29	S	M	M_S	13.52	5.12	9	27.64	3.015	2.995	1.04	13.25	8.7	1.77	5.835	0.51	9.4	2.35	2.505	4.02	0.45	9	4
CSJ-29	S	M	M_S	14.84	6.3	8.05	29.19	3.09	2.91833	1.11667	13.8067	9.17667	1.84167	6.13167	0.621667	9.97667	2.88333	2.47	4.05667	0.561667	8.27667	3.70667
CSJ-28	S	M	M_S	9.84	2.48	2.69	15.01	5.58	3.48	0.515	15.05	6.9	2.45	4.895	0.91	6.65	5.6	1.455	3.14	0.755	12.1	2.4
CSJ-28	S	M	M_S	10.83	2.4	3.12	16.35	5.86	3.525	0.545	15.7	7.3	2.675	5.355	0.95	6.3	5.1	1.535	3.3	0.7	11.15	2
CSJ-28	S	M	M_S	11.12	2.08	3.34	16.54	5.535	3.405	0.56	14.4	6.65	2.58	4.97	0.885	7.4	6.05	1.58	3.105	0.84	12.5	2.7
CSJ-28	S	M	M_S	11.51	2.9	2.65	17.06	5.72833	3.53	0.59	15.14	7.01	2.62833	5.14333	0.965	6.84333	5.63333	1.57333	3.22167	0.815	11.9767	2.40667
CSJ-4	S	M	M_S	13.43	4.2	7.72	25.35	2.895	3.63	1.545	18.75	7.45	3.73	8.12	0.2	8.35	6.45	1.75	2.98	0.65	8.4	1.9
CSJ-4	S	M	M_S	13.41	4.18	9.12	26.71	3.01	3.705	1.555	18.05	7.9	3.61	8.415	0.18	7.75	5.6	1.825	3.105	0.675	8.75	1.5
CSJ-4	S	M	M_S	13.28	3.95	8.71	25.94	2.94	3.7	1.59	18	7.1	3.755	8.01	0.235	8.95	7.1	1.71	2.945	0.62	8	2.2
CSJ-4	S	M	M_S	13.06	3.54	8.34	24.94	3.01833	3.73833	1.61333	18.3567	7.54333	3.75833	8.25167	0.255	8.41	6.43333	1.81167	3.05	0.698333	8.44333	1.90667
CSJ-5	S	M	M_S	14.13	4.8	6.33	25.26	2.515	3.255	2.27	19.05	7.85	2.98	7.295	0.355	9.85	6.2	1.85	3.09	0.64	9.45	2.35
CSJ-5	S	M	M_S	17.28	5.14	6.78	29.2	2.61	3.11	2.345	18.5	7.95	3.305	7.645	0.33	9.05	5.35	1.94	3.215	0.735	9	1.95
CSJ-5	S	M	M_S	16.87	4.61	7.26	28.74	2.54	3.31	2.255	19.2	8.15	3.275	7.135	0.395	10.75	6.85	1.81	3.01	0.55	10	2.65
CSJ-5	S	M	M_S	15.74	5.02	6.14	26.9	2.625	3.285	2.34	19.0067	8.04333	3.24667	7.42833	0.41	9.94333	6.18333	1.91667	3.145	0.691667	9.54333	2.35667
CSJ-12	S	M	M_S	14.39	3.62	7.15	25.16	2.9	3.115	0.665	18.75	7.8	1.805	7	0.815	12.9	4.45	2.215	2.85	0.625	15.6	2.7
CSJ-12	S	M	M_S	13.68	3.5	6.36	23.54	3.005	3.045	0.705	18	7.5	1.805	6.555	0.89	13.9	3.6	2.365	3.08	0.715	16.25	3
CSJ-12	S	M	M_S	14.56	4.12	7.08	25.76	2.91	3.2	0.66	17.9	8.2	1.885	6.6	0.76	12.2	5.1	2.305	2.935	0.545	15	2.5
CSJ-12	S	M	M_S	15.49	3.6	6.39	25.48	3.00833	3.18	0.726667	18.3067	7.89333	1.89167	6.78833	0.871667	13.06	4.43333	2.345	2.995	0.678333	15.6767	2.77333
CSJ-2	S	M	M_S	15.24	3.02	5.16	23.42	2.315	3.43	1.315	12.55	7.4	4.465	5.955	0.34	9.45	5.15	2.08	2.93	1.04	9.5	3.6
CSJ-2	S	M	M_S	14.82	2.47	4.68	21.97	2.405	3.17	1.405	12.2	7.85	4.32	6.07	0.3	10.25	5.7	2.18	3.1	1.015	8.4	3.9
CSJ-2	S	M	M_S	13.6	3.54	5.03	22.17	2.305	3.54	1.3	12.8	7	4.425	5.7	0.355	8.4	4.7	2.145	2.965	1.08	10.2	3.4
CSJ-2	S	M	M_S	13.98	2.5	5.11	21.59	2.41167	3.44	1.39	12.6067	7.47667	4.46333	5.97833	0.381667	9.42667	5.23333	2.185	3.03833	1.095	9.42667	3.67333
CSJ-21	S	M	M_S	16.14	5.26	9.54	30.94	2.13	2.715	0.545	35.35	10.2	2.145	5.59	1.335	13.6	7.1	3.16	3.375	0.755	16.15	4.65
CSJ-21	S	M	M_S	16.55	5.54	8.69	30.78	2.205	2.595	0.605	34.45	10.55	2.285	6.385	1.445	12.9	6.6	3.43	3.335	0.68	16	4.25
CSJ-21	S	M	M_S	16.14	5.49	10.12	31.75	2.195	2.81	0.54	34.6	9.8	2.18	5.71	1.215	14.5	7.55	3.22	3.26	0.8	15.55	4.95
CSJ-21	S	M	M_S	14.68	5.11	9.23	29.02	2.24667	2.76667	0.613333	34.89	10.2433	2.26333	5.965	1.38167	13.7267	7.13333	3.32	3.36333	0.795	15.96	4.65667
CSJ-15	S	M	M_S	19.33	5.74	10.58	35.65	2.76	3.215	1.45	15.25	7.2	2.72	7.45	0.68	16.35	7.35	2.385	3.295	0.705	15.1	3.8
CSJ-15	S	M	M_S	14.08	6.25	10.69	31.02	2.905	3.135	1.555	15.55	7.1	3.015	7.67	0.76	15.7	6.85	2.28	3.38	0.775	14.3	4.1
CSJ-15	S	M	M_S	17.14	5.45	11.93	34.52	2.815	3.295	1.48	15.85	7.55	3	7.305	0.645	16.7	7.8	2.445	3.22	0.62	15.05	3.6
CSJ-15	S	M	M_S	15.37	5.48	12.07	32.92	2.89667	3.275	1.545	15.64	7.34333	2.97167	7.545	0.745	16.31	7.38333	2.42	3.33833	0.75	14.8767	3.87333
CSJ-16	S	M	M_S	16.17	5.01	10.74	31.92	2.175	2.69	0.955	16.3	7.3	2.055	7.105	0.71	28.3	9.4	2.81	4	0.775	19.85	4.1
CSJ-16	S	M	M_S	15.52	6.01	9.28	30.81	2.165	2.545	0.995	15.4	7.65	2.305	7.365	0.78	29.05	8.9	2.695	4.205	0.705	20.4	4.4
CSJ-16	S	M	M_S	13.81	5.3	11.35	30.46	2.31	2.785	1.04	15.85	7.5	2.275	7.05	0.61	27.1	9.85	2.845	4.015	0.84	19.95	3.9
CSJ-16	S	M	M_S	15.62	5.6	9.58	30.8	2.28667	2.73333	1.04667	15.94	7.54333	2.27167	7.24333	0.75	28.21	9.43333	2.83333	4.11333	0.823333	20.1267	4.17333
CSJ-18	S	M	M_S	17.95	6.5	10.81	35.26	2.925	3.715	1.85	16.65	7.5	2.565	7.27	1.26	15.65	6.05	2.135	2.925	0.525	9.65	0.95
CSJ-18	S	M	M_S	19.77	6.18	8.96	34.91	3.05	3.565	1.92	17	8.1	2.55	7.525	1.37	15.05	5.2	2.29	3.035	0.605	10.4	1.25
CSJ-18	S	M	M_S	15.92	6.07	10.12	32.11	2.94	3.795	1.855	16.55	7	2.605	7.31	1.165	16.25	6.7	2.205	2.94	0.46	9.1	0.75
CSJ-18	S	M	M_S	14.47	7.12	9.06	30.65	3.04167	3.75167	1.925	16.8033	7.59333	2.63333	7.43833	1.315	15.71	6.03333	2.26	3.00667	0.58	9.77667	1.02333
CSJ-47	S	M	M_S	22.14	7.6	8.48	38.22	4.625	2.72	1.01	11.8	8.9	2.83	6.585	0.525	8.75	5.2	2.29	3.95	0.695	11.3	3.25
CSJ-47	S	M	M_S	13.89	7.5	7.63	29.02	4.78	2.8	1.09	10.5	8.7	2.97	7.035	0.58	8.15	5.6	2.405	4.02	0.625	10.45	3.55
CSJ-47	S	M	M_S	15.09	7.3	8.09	30.48	5.01	2.64	1	11.7	9.25	3.065	6.745	0.49	9.5	4.9	2.31	3.905	0.75	12.05	3.05
CSJ-47	S	M	M_S	15.45	7.4	7.16	30.01	4.875	2.78	1.08333	11.3933	9.01	3.015	6.85833	0.581667	8.86	5.28333	2.385	3.99833	0.74	11.3267	3.32333
CSJ-45	S	M	M_S	12.77	3	4.8	20.57	3.735	2.82	1.25	13.4	9.2	2.82	7.95	0.515	11.35	8.45	2.345	3.875	0.535	10.15	4.5
CSJ-45	S	M	M_S	10	2.94	5.68	18.62	4.07	2.64	1.315	14.05	9.8	3.205	8.11	0.605	11.55	8.85	2.365	3.79	0.5	10.8	4.8
CSJ-45	S	M	M_S	13.6	3.04	5.8	22.44	3.75	2.925	1.24	13.05	8.7	3.115	7.8	0.46	10.9	8.15	2.505	3.86	0.59	9.65	4.3
CSJ-45	S	M	M_S	11.41	2.55	4.36	18.32	3.92167	2.855	1.31833	13.59	9.29333	3.10667	8.02333	0.576667	11.3267	8.53333	2.455	3.88167	0.591667	10.26	4.57333
CSJ-13	C	P	P_C	20.26	6.4	11.34	38	1.16	4.105	0.815	11.3	6.2	1.705	9.695	0.69	13.45	6.4	1.625	3.13	0.52	13.65	2.55
CSJ-13	C	P	P_C	19.86	5.44	9.86	35.16	1.245	4.07	0.77	12.05	5.55	1.575	10.65	0.625	14.25	6.95	1.54	3.075	0.565	14.7	2.35
CSJ-13	C	P	P_C	17.39	6.12	10.44	33.95	1.15	4.16	0.87	10.75	6.45	1.6	10.08	0.74	12.55	5.95	1.705	3.185	0.495	12.65	2.85
CSJ-13	C	P	P_C	18.62	5.6	11.09	35.31	1.235	4.15167	0.858333	11.4267	6.11667	1.66667	10.2017	0.725	13.4767	6.48333	1.66333	3.17	0.566667	13.7167	2.62333
CSJ-34	C	P	P_C	25.89	7.75	15.26	48.9	1.27	5.075	1.3	12.25	7.25	1.795	6.885	0.735	15.15	6.15	1.82	3.845	0.405	6.4	3.05
CSJ-34	C	P	P_C	23.26	7.92	13.99	45.17	1.26	5.215	1.27	12.55	7.55	2	7.405	0.78	15.7	6.7	1.91	3.765	0.36	7	3.4
CSJ-34	C	P	P_C	24.1	7.8	14.21	46.11	1.305	5.04	1.38	12	7.2	1.935	6.95	0.68	14.55	5.85	1.725	3.93	0.46	5.9	2.8
CSJ-34	C	P	P_C	25.7	8.25	14	47.95	1.32833	5.15	1.35667	12.3267	7.38333	1.95	7.14	0.771667	15.1933	6.28333	1.85833	3.88667	0.448333	6.48333	3.12333
CSJ-39	C	P	P_C	23.07	7.4	14.65	45.12	0.87	3.87	0.42	19.65	7.5	1.885	10.965	0.28	10.15	7.1	1.86	4.875	0.72	12.9	4.85
CSJ-39	C	P	P_C	24.56	6.5	14.01	45.07	1.005	3.715	0.43	20.2	7.8	2.115	11.545	0.235	9.4	7.6	1.785	4.87	0.8	13.4	4.65
CSJ-39	C	P	P_C	21.27	7.1	16.11	44.48	0.82	3.945	0.505	19.4	7.05	2.005	11.105	0.31	10.8	6.7	1.945	4.93	0.63	11.8	5.15
CSJ-39	C	P	P_C	22.84	7.25	14.22	44.31	0.948333	3.88333	0.491667	19.81	7.5	2.04167	11.265	0.315	10.1767	7.18333	1.90333	4.93167	0.756667	12.75	4.92333
CSJ-40	C	P	P_C	22.41	11.7	16.62	50.73	0.675	5.415	0.52	14.1	6.65	1.695	7.28	0.28	4.45	2.5	1.94	4.275	0.755	8.65	3.75
CSJ-40	C	P	P_C	23.28	12.75	18.53	54.56	0.59	5.57	0.565	14.4	6.55	1.88	7.36	0.345	4.6	3	1.845	4.365	0.845	9.45	3.55
CSJ-40	C	P	P_C	21.86	10.75	19	51.61	0.71	5.51	0.48	13.7	6.4	1.76	7.56	0.245	4.15	2.1	1.995	4.305	0.69	8	4.05
CSJ-40	C	P	P_C	24.63	12.14	16.31	53.08	0.708333	5.53833	0.561667	14.1267	6.58333	1.81833	7.46	0.33	4.46	2.58333	1.96667	4.355	0.803333	8.75	3.82333
CSJ-41	C	P	P_C	17.88	4.7	10.47	33.05	0.56	4.255	0.305	23.65	7.5	2.21	11.345	0.465	10.1	6.4	1.735	3.97	0.405	5.4	3.1
CSJ-41	C	P	P_C	20.56	5.12	9.82	35.5	0.625	4.41	0.33	24.3	8.15	2.49	12.05	0.405	11.05	6.9	1.83	4.115	0.45	6.05	2.9
CSJ-41	C	P	P_C	18.63	4.81	9.06	32.5	0.55	4.205	0.29	23.3	7.1	2.355	11.86	0.51	9.45	6	1.605	4.045	0.375	4.95	3.4
CSJ-41	C	P	P_C	20.13	5.02	10	35.15	0.628333	4.33	0.348333	23.81	7.63333	2.39167	11.8117	0.5	10.26	6.48333	1.76333	4.08333	0.45	5.51667	3.17333
CSJ-44	C	P	P_C	22.86	6.95	12.52	42.33	0.875	3.63	0.635	19.55	7	1.665	10.865	0.315	14.45	3.8	2.655	3.44	0.685	10.1	3.7
CSJ-44	C	P	P_C	20.52	7.3	14.36	42.18	0.81	3.74	0.67	20.45	6.4	1.855	11.49	0.345	15.45	4.35	2.72	3.5	0.72	10.95	4.05
CSJ-44	C	P	P_C	24.3	7.05	12.81	44.16	0.925	3.585	0.595	19	7.5	1.685	11.03	0.3	13.4	3.4	2.875	3.34	0.63	9.55	3.45
CSJ-44	C	P	P_C	21.82	7.25	11.69	40.76	0.92	3.69167	0.673333	19.7267	7.01667	1.775	11.1883	0.36	14.4933	3.9	2.79	3.46667	0.718333	10.25	3.77333
CSJ-30	C	P	P_C	21.17	9.05	9.54	39.76	1.15	4.86	0.925	14	8.5	1.555	8.45	0.365	13.85	4.3	1.165	4.68	0.34	12.25	3.7
CSJ-30	C	P	P_C	23.07	8.71	8.01	39.79	1.085	5.045	0.96	14.4	8.9	1.645	8.335	0.33	14.75	4.85	1.25	5.17	0.33	11.3	4.05
CSJ-30	C	P	P_C	22.45	8.25	8.16	38.86	1.205	4.805	0.89	13.5	7.95	1.545	8.46	0.405	13.15	4	1.08	4.755	0.305	12.95	3.45
CSJ-30	C	P	P_C	18.03	8.23	9	35.26	1.19667	4.94333	0.965	14.0267	8.5	1.62167	8.475	0.406667	13.9767	4.43333	1.205	4.90833	0.365	12.2167	3.77333
CSJ-25	C	P	P_C	23.42	10.15	14.56	48.13	0.69	3.785	0.325	30.9	8.35	1.58	7.17	0.57	10.55	6.6	1.31	4.14	0.63	14.15	4.8
CSJ-25	C	P	P_C	21.94	9.9	14.66	46.5	0.65	3.94	0.33	30.05	8.15	1.44	8.17	0.63	11.55	7.15	1.445	4.32	0.675	14.75	4.6
CSJ-25	C	P	P_C	20.18	9.65	13	42.83	0.72	3.815	0.305	31.1	8.7	1.545	8.125	0.5	9.9	6.15	1.205	4.255	0.57	13.3	5.1
CSJ-25	C	P	P_C	22.57	11.35	16.11	50.03	0.736667	3.88667	0.36	30.7433	8.45	1.56167	7.88167	0.606667	10.7267	6.68333	1.36	4.27833	0.665	14.1167	4.87333
CSJ-26	C	P	P_C	18.9	7.88	12.85	39.63	1.345	5.56	0.56	15.3	7.15	2.62	7.695	0.76	13	7.2	2.005	3.235	0.62	13.4	2.7
CSJ-26	C	P	P_C	20.36	7.35	12.35	40.06	1.365	5.77	0.52	16.05	7.9	3.005	8.565	0.705	14.1	7.75	2.13	3.405	0.695	14.05	2.5
CSJ-26	C	P	P_C	17.81	7.9	13.68	39.39	1.275	5.545	0.605	15.4	6.55	2.83	8.45	0.815	12.3	6.75	1.93	3.11	0.55	12.75	3
CSJ-26	C	P	P_C	19.67	7.35	13.22	40.24	1.37833	5.665	0.601667	15.6433	7.25	2.85833	8.29667	0.8	13.1933	7.28333	2.06167	3.29	0.661667	13.45	2.77333
CSJ-27	C	P	P_C	22.95	11.65	11.66	46.26	1.55	6.095	0.4	12.7	5.3	1.56	6.365	0.585	6.95	4.55	1.16	3.17	0.39	12.1	2.7
CSJ-27	C	P	P_C	25.56	10.11	13.02	48.69	1.415	6.325	0.43	12.8	5.8	1.675	6.825	0.65	7.6	5.1	1.255	3.105	0.415	13.15	2.5
CSJ-27	C	P	P_C	24.45	10.14	13.57	48.16	1.59	6.015	0.395	13.35	4.95	1.63	6.42	0.54	6.05	4.1	1.09	3.245	0.355	11.25	3
CSJ-27	C	P	P_C	22.16	11.6	11.44	45.2	1.56833	6.185	0.448333	13.01	5.4	1.66167	6.59667	0.631667	6.92667	4.63333	1.20833	3.21333	0.426667	12.2167	2.77333
CSJ-48	C	P	P_C	23.14	8.55	11.47	43.16	1.24	6.64	0.53	11.45	6.65	1.61	11.455	0.34	13.75	4.75	1.09	2.98	0.345	7.45	2.75
CSJ-48	C	P	P_C	22.91	9.21	13.91	46.03	1.305	6.81	0.59	11.7	6.55	1.775	11.48	0.36	15.2	5.3	1.24	2.86	0.325	8.1	3.1
CSJ-48	C	P	P_C	25.78	9.01	12.42	47.21	1.185	6.5	0.5	12.05	6.85	1.625	10.835	0.3	12.55	4.35	1	3.005	0.35	6.5	2.5
CSJ-48	C	P	P_C	24.03	8.12	12.02	44.17	1.29333	6.69	0.58	11.7933	6.73333	1.71	11.3167	0.373333	13.8933	4.85	1.15	2.98833	0.38	7.4	2.82333
CSJ-36	C	P	P_C	20.96	7.84	13.04	41.84	2.45	5.42	2.07	11.4	5.45	1.41	10.635	0.365	11.15	3.55	1.885	3.695	0.31	14.1	3.65
CSJ-36	C	P	P_C	21.3	8.5	10.68	40.48	2.365	5.585	2.145	12.2	6.15	1.36	11.75	0.3	10.4	3.85	1.96	3.73	0.34	13.05	4
CSJ-36	C	P	P_C	19.06	8.02	10.65	37.73	2.455	5.51	2.015	11.8	5.05	1.35	11.505	0.41	12	3.25	1.78	3.61	0.29	14.75	3.4
CSJ-36	C	P	P_C	19.77	8.1	11.28	39.15	2.47333	5.545	2.11667	11.86	5.6	1.41333	11.3567	0.398333	11.2433	3.6	1.915	3.71833	0.353333	14.0167	3.72333
CSJ-37	C	P	P_C	19.51	9.12	9.63	38.26	1.98	6.11	1.025	12.25	5.3	1.555	10.045	0.345	15.95	2.8	1.325	2.795	0.435	6.4	3.5
CSJ-37	C	P	P_C	19.46	8.36	11.05	38.87	1.905	6.23	1.09	12.75	5.65	1.555	11.03	0.405	15.05	3.35	1.415	2.645	0.47	5.7	3.85
CSJ-37	C	P	P_C	21.14	8.5	11	40.64	2.04	6.195	0.995	12.05	5	1.62	10.27	0.305	16.7	2.4	1.235	2.895	0.41	6.8	3.25
CSJ-37	C	P	P_C	19.31	9.85	9.15	38.31	2.025	6.21833	1.07667	12.41	5.36667	1.61667	10.5083	0.391667	15.96	2.9	1.365	2.81833	0.478333	6.35	3.57333
CSJ-3	C	P	P_C	19.2	6.01	10.55	35.76	2.22	4.325	1.705	29.8	8.55	1.645	7.56	0.085	8.75	5.5	1.62	3.15	0.385	12.95	2.35
CSJ-3	C	P	P_C	19.42	5.96	9.14	34.52	2.185	4.41	1.75	30.65	9.3	1.58	7.38	0.1	9.35	4.65	1.7	3.27	0.345	11.75	1.95
CSJ-3	C	P	P_C	16.81	6.43	10.85	34.09	2.275	4.135	1.67	30.05	8.25	1.67	7.55	0.08	8.1	6.05	1.53	3.06	0.4	13.55	2.5
CSJ-3	C	P	P_C	16.81	5.82	11.06	33.69	2.27667	4.33	1.74833	30.2267	8.75	1.67167	7.55667	0.128333	8.79333	5.45	1.65667	3.2	0.416667	12.8	2.30667
CSJ-6	C	P	P_C	20.6	6	8.81	35.41	1.47	4.25	1.495	28.25	8.3	1.86	8.485	0.485	9.4	4	1.3	3.395	0.575	18.2	3.25
CSJ-6	C	P	P_C	18.13	5.4	7.59	31.12	1.45	4.405	1.55	29.1	8.05	1.855	7.96	0.43	10.05	3.1	1.415	3.515	0.595	16.9	2.85
CSJ-6	C	P	P_C	18.21	5.2	8.02	31.43	1.57	4.205	1.41	28	8.7	1.785	7.995	0.53	8.7	4.8	1.205	3.44	0.55	19.05	3.75
CSJ-6	C	P	P_C	18.48	5.6	7.65	31.73	1.54667	4.32667	1.525	28.51	8.4	1.87333	8.20667	0.521667	9.44333	4.01667	1.34667	3.49	0.613333	18.1	3.32333
CSJ-7	C	P	P_C	20.29	5.3	8.32	33.91	1.26	3.865	1.82	26.15	8.45	1.725	8.46	0.4	7	4.5	1.885	3.23	0.535	16.15	3.85
CSJ-7	C	P	P_C	19.42	5.7	10.04	35.16	1.32	3.965	1.885	27.25	9.05	1.855	8.965	0.345	7.75	3.6	2.04	3.58	0.605	16.65	3.45
CSJ-7	C	P	P_C	18.52	5.6	9.11	33.23	1.215	3.81	1.775	26.3	7.75	1.805	8.54	0.445	6.45	5.3	1.845	3.275	0.49	15.6	4.35
CSJ-7	C	P	P_C	18.71	5.2	8.1	32.01	1.315	3.92	1.86667	26.6267	8.46667	1.835	8.715	0.436667	7.12667	4.51667	1.96333	3.40167	0.583333	16.1833	3.92333
CSJ-8	C	P	P_C	18.55	4.91	9.36	32.82	1.395	3.765	1.19	24.2	7.95	2.005	9.855	0.425	8.85	6.45	1.605	3.34	0.56	10.35	2.75
CSJ-8	C	P	P_C	17	5.5	8.02	30.52	1.515	3.855	1.065	25.1	8.6	2.2	10.86	0.395	9.75	5.55	1.64	3.455	0.63	11.15	2.35
CSJ-8	C	P	P_C	17.27	5.75	9.11	32.13	1.335	3.725	1.245	24.05	7.4	2	10.16	0.455	7.8	7.15	1.575	3.265	0.475	9.8	3.1
CSJ-8	C	P	P_C	20.74	5.1	8.16	34	1.465	3.82167	1.20667	24.51	8.03333	2.10833	10.3517	0.465	8.86	6.43333	1.64667	3.39333	0.595	10.4833	2.77333
CSJ-9	C	P	P_C	20.8	6.47	9.06	36.33	1.245	4.3	1.975	18.3	7.7	2.17	7.735	0.505	11.6	5.7	1.86	3.165	0.59	15	2.95
CSJ-9	C	P	P_C	20.33	6.6	8.36	35.29	1.305	4.115	2.055	19.1	7.5	2.095	8.015	0.55	10.55	4.8	1.98	3.19	0.51	15.7	2.55
CSJ-9	C	P	P_C	19.82	6.9	8.81	35.53	1.2	4.405	1.91	18.05	8	2.055	8.065	0.48	12.45	6.5	1.805	3.12	0.65	14.4	3.45
CSJ-9	C	P	P_C	22.66	6.19	9.39	38.24	1.3	4.31333	2.02	18.5433	7.78333	2.14667	7.99833	0.551667	11.5933	5.71667	1.92167	3.19833	0.623333	15.0833	3.02333
CSJ-10	C	P	P_C	20.63	8.2	10.68	39.51	1.47	4.065	0.605	19.25	7.8	1.52	6.25	0.195	9.8	4.25	1.405	3.545	0.555	13.15	3.4
CSJ-10	C	P	P_C	20.4	8.6	11.09	40.09	1.585	4.265	0.565	19.95	7.1	1.36	5.735	0.175	10.45	3.75	1.47	3.655	0.6	14.05	3
CSJ-10	C	P	P_C	21.24	7.52	9.63	38.39	1.505	4.02	0.65	18.7	7.95	1.44	5.91	0.22	9.05	4.5	1.35	3.55	0.5	12.5	3.9
CSJ-10	C	P	P_C	24.56	7.8	10.47	42.83	1.57	4.15667	0.646667	19.36	7.66667	1.48	6.025	0.236667	9.82667	4.21667	1.44833	3.62333	0.591667	13.2833	3.47333
CSJ-11	C	P	P_C	19.64	6.2	10.39	36.23	1.48	4.86	1.75	22.85	8.2	1.975	12.235	0.895	7.4	6.75	1.66	4.165	0.56	24.2	4.4
CSJ-11	C	P	P_C	18.04	6.3	9.36	33.7	1.555	5.05	1.81	23.55	8.15	2.06	13.06	0.945	8.15	5.95	1.77	4.305	0.655	23.25	4
CSJ-11	C	P	P_C	23.16	6.02	9.04	38.22	1.505	4.76	1.705	22.5	7.9	2.005	12.39	0.815	6.55	7.5	1.565	4.16	0.5	24.95	4.7
CSJ-11	C	P	P_C	21.86	7	11.14	40	1.56333	4.93	1.795	23.0267	8.13333	2.05333	12.6217	0.925	7.42667	6.78333	1.705	4.25	0.611667	24.1833	4.40667
CSJ-1	C	P	P_C	20.06	4.8	8.04	32.9	1.33	4.58	1.04	12.75	6.65	1.64	6.645	0.205	15.15	7	1.785	3.98	0.845	9.1	3.2
CSJ-1	C	P	P_C	19.24	5.5	6.65	31.39	1.355	4.87	1.08	13.5	7.35	1.45	6.545	0.22	15.95	7.55	1.815	3.855	0.8	9.75	3.55
CSJ-1	C	P	P_C	22.8	5.5	6.99	35.29	1.245	4.5	0.995	12.55	6.1	1.455	7.01	0.24	14.45	6.7	1.755	4.06	0.895	8.55	2.95
CSJ-1	C	P	P_C	19.11	5.2	7	31.31	1.36	4.69	1.07833	12.9933	6.75	1.555	6.79333	0.261667	15.2433	7.13333	1.825	4.005	0.886667	9.18333	3.27333
CSJ-23	C	P	P_C	23.12	6.72	10.56	40.4	0.8	4.27	0.285	25.8	8.2	1.685	7.575	0.56	12.45	6.35	1.695	4.075	0.545	14.95	5.25
CSJ-23	C	P	P_C	21.46	6.45	11.36	39.27	0.83	4.355	0.295	26.8	7.6	1.525	8.145	0.62	11.3	6.85	1.58	4.11	0.5	15.4	5.05
CSJ-23	C	P	P_C	22.76	7.12	9.06	38.94	0.755	4.25	0.24	26.05	8.95	1.7	8	0.52	12.85	5.95	1.775	4.11	0.605	14.1	5.55
CSJ-23	C	P	P_C	23.28	7.3	10.23	40.81	0.845	4.33167	0.313333	26.2767	8.3	1.67667	7.96667	0.606667	12.26	6.43333	1.72333	4.13833	0.59	14.8667	5.32333
CSJ-22	C	P	P_C	21.77	4.1	8.16	34.03	0.72	4.36	0.29	20.2	8.45	2.635	7.805	0.995	14.2	7.35	1.545	4.275	0.63	12.75	4.95
CSJ-22	C	P	P_C	22.15	3.85	9.01	35.01	0.755	4.545	0.315	20.95	7.65	2.795	8.125	1.08	15.05	7.9	1.62	4.24	0.59	13.5	4.75
CSJ-22	C	P	P_C	19.14	4.2	7.56	30.9	0.67	4.385	0.25	20	9.05	2.69	7.815	0.89	13.2	6.9	1.505	4.3	0.655	12.05	5.25
CSJ-22	C	P	P_C	21.6	3.6	9.07	34.27	0.765	4.47	0.325	20.4433	8.43333	2.74667	7.975	1.02833	14.21	7.43333	1.59667	4.31167	0.665	12.8167	5.02333
CSJ-24	C	P	P_C	21.03	9.3	17.67	48	0.585	6.63	0.295	25.4	7.35	1.825	5.92	0.77	14.85	5.7	1.135	4.085	0.585	18.25	4
CSJ-24	C	P	P_C	19.24	10.25	18	47.49	0.59	6.89	0.31	26.05	6.65	1.84	6.615	0.84	15.95	6.25	1.265	4.33	0.65	19.05	3.8
CSJ-24	C	P	P_C	22.47	9.1	19.08	50.65	0.55	6.505	0.25	25.45	8.2	2.005	6.02	0.695	13.9	5.25	1.07	4.125	0.505	17.45	4.3
CSJ-24	C	P	P_C	20.33	9.45	16.85	46.63	0.625	6.715	0.325	25.6933	7.45	1.93	6.245	0.808333	14.96	5.78333	1.19667	4.22	0.62	18.3	4.07333
CSJ-14	C	P	P_C	20.13	7.5	14.65	42.28	0.72	2.71	0.73	16.95	7.5	1.68	6.215	0.68	8.95	5.55	1.56	3.25	0.505	15.5	2.9
CSJ-14	C	P	P_C	22.4	7.3	16.35	46.05	0.63	2.905	0.805	17.8	7.5	1.695	6.71	0.595	9.55	4.65	1.655	3.445	0.56	16.5	2.5
CSJ-14	C	P	P_C	23.72	7.15	15.14	46.01	0.77	2.615	0.7	17.05	7.1	1.755	6.505	0.73	8.1	6.35	1.46	3.165	0.465	14.55	3.4
CSJ-14	C	P	P_C	22.81	7.35	16	46.16	0.756667	2.78333	0.785	17.3267	7.41667	1.75	6.53667	0.708333	8.92667	5.56667	1.59833	3.32667	0.55	15.5667	2.97333
CSJ-17	C	P	P_C	17.88	6.85	14.25	38.98	0.96	3.165	0.88	14.55	6.75	1.72	9.75	0.505	13	8.35	1.855	3.665	0.445	19.55	4.4
CSJ-17	C	P	P_C	20.07	7.42	12.68	40.17	0.89	3.32	0.905	14.4	6.6	1.705	10.565	0.58	13.7	7.45	1.925	3.6	0.39	20.35	4
CSJ-17	C	P	P_C	18.9	7.1	14.13	40.13	0.995	3.105	0.825	15.3	7.05	1.62	10.35	0.46	12.55	9.15	1.8	3.72	0.52	18.9	4.9
CSJ-17	C	P	P_C	18.33	6.9	12.35	37.58	0.998333	3.23667	0.91	14.81	6.85	1.72167	10.2817	0.555	13.1433	8.36667	1.9	3.70167	0.491667	19.65	4.47333
CSJ-19	C	P	P_C	22.55	10.6	10.25	43.4	1.315	4.935	1.53	14.95	7.7	1.595	6.25	0.655	6.95	4.3	1.295	2.795	0.325	11.1	2.5
CSJ-19	C	P	P_C	23.26	9.5	11.48	44.24	1.22	5.085	1.59	15.1	7.25	1.63	6.56	0.715	7.7	3.6	1.42	2.83	0.3	11.9	2.1
CSJ-19	C	P	P_C	21.48	10.5	10	41.98	1.405	5	1.48	15.7	8.3	1.5	6.42	0.605	6.05	4.8	1.195	2.855	0.345	10.4	3
CSJ-19	C	P	P_C	19.72	10.2	12.13	42.05	1.36333	5.04667	1.57333	15.31	7.8	1.615	6.47	0.698333	6.96	4.28333	1.34333	2.86667	0.363333	11.1833	2.57333
CSJ-46	C	P	P_C	26.33	14.2	9.92	50.45	0.99	3.935	0.515	31	9.5	1.95	9.755	0.525	8.35	5.85	2.325	4.375	0.455	17.8	5.25
CSJ-46	C	P	P_C	25.42	13.8	12.05	51.27	1.085	4.07	0.56	31.4	10.65	1.99	10.985	0.61	9.1	6.4	2.235	4.635	0.5	18.55	5.6
CSJ-46	C	P	P_C	25.19	14.4	11.41	51	0.915	3.88	0.49	32.2	10.2	1.89	10.265	0.455	7.5	5.45	2.43	4.345	0.44	16.7	5
CSJ-46	C	P	P_C	24.87	12.14	11.58	48.59	1.04667	4.00167	0.561667	31.5933	10.1667	1.98333	10.395	0.57	8.37667	5.95	2.37	4.49167	0.505	17.7333	5.32333
CSJ-13	S	P	P_S	13.6	4.35	10.06	28.01	1.805	3.94	1.175	13.05	6.9	2.415	8.02	1.435	14.1	7.3	1.99	3.525	0.565	17.25	2.9
CSJ-13	S	P	P_S	15.03	3.55	11.14	29.72	1.9	3.775	1.235	13.7	6.45	2.585	8.35	1.48	15.2	6.8	2.16	3.69	0.6	18.05	3.2
CSJ-13	S	P	P_S	14.79	4.1	9.56	28.45	1.87	3.99	1.135	12.95	6.5	2.545	7.91	1.355	13.2	7.75	2.08	3.555	0.51	16.9	2.7
CSJ-13	S	P	P_S	15.76	4.01	9.71	29.48	1.90833	3.94167	1.22167	13.2933	6.66667	2.555	8.15333	1.46333	14.2267	7.33333	2.11667	3.63	0.598333	17.45	2.97333
CSJ-34	S	P	P_S	16.4	5.05	11.02	32.47	4.59	2.88	2.085	13.8	8.85	3.96	5.025	0.83	11.25	5.6	2.32	3.515	1	9.8	3.7
CSJ-34	S	P	P_S	16.3	5.16	12.17	33.63	4.52	2.905	2.145	15.2	7.8	3.925	5.5	0.855	10.55	6.15	2.56	3.42	1.065	10.65	4
CSJ-34	S	P	P_S	15.15	4.46	13.05	32.66	4.765	2.77	2.055	13.1	8.55	3.72	5.06	0.8	11.8	5.15	2.405	3.56	0.96	9.1	3.5
CSJ-34	S	P	P_S	19.72	5.25	12.01	36.98	4.675	2.89167	2.135	14.0933	8.45	3.90833	5.255	0.868333	11.26	5.68333	2.46833	3.53833	1.04833	9.9	3.77333
CSJ-39	S	P	P_S	19.4	6.14	12.59	38.13	2.675	2.695	0.77	18.8	8.7	3.815	8.225	0.39	22.65	7.3	3.815	4.305	0.775	22.7	6.1
CSJ-39	S	P	P_S	16.8	5.35	14.21	36.36	2.655	2.545	0.85	17.9	8.15	4.31	8.645	0.43	21.6	6.8	4.02	4.45	0.72	23.55	6.4
CSJ-39	S	P	P_S	17.55	5.5	14.05	37.1	2.79	2.765	0.72	18.2	9.1	4.22	8.34	0.36	23.85	7.75	3.755	4.27	0.845	21.45	5.9
CSJ-39	S	P	P_S	20.8	4.96	12.36	38.12	2.75667	2.70833	0.82	18.36	8.7	4.155	8.46333	0.433333	22.76	7.33333	3.90333	4.38167	0.82	22.6167	6.17333
CSJ-40	S	P	P_S	28.01	8.55	11.47	48.03	1.44	4.86	0.57	19.2	7.9	2.015	7.775	0.885	16.5	4.55	2.26	4.66	0.79	14.8	7.6
CSJ-40	S	P	P_S	20.19	8.3	13.36	41.85	1.355	5.04	0.605	18.55	8.3	2.16	8.24	0.965	15.55	4.95	2.395	4.885	0.85	15.7	7.9
CSJ-40	S	P	P_S	19.19	7.4	12.02	38.61	1.545	4.84	0.545	19.25	7.45	2.105	7.8	0.8	17.35	4.25	2.305	4.705	0.71	13.85	7.4
CSJ-40	S	P	P_S	22.53	8.8	13.66	44.99	1.49667	4.95333	0.613333	19.06	7.93333	2.13333	7.99833	0.923333	16.5267	4.63333	2.36	4.79	0.823333	14.8333	7.67333
CSJ-41	S	P	P_S	14.79	3.5	9.16	27.45	3.52	1.835	0.355	27.4	8.7	4.1	8.42	0.635	18.45	7.15	2.335	2.83	0.605	12.85	3.55
CSJ-41	S	P	P_S	18.23	4.02	10.21	32.46	3.665	1.615	0.385	26.05	9.4	4.155	8.525	0.695	16.9	7.55	2.305	2.99	0.55	13.4	3.85
CSJ-41	S	P	P_S	14.47	3.3	9.03	26.8	3.595	1.895	0.315	26.65	8.15	4.12	8.195	0.55	19.2	6.85	2.41	2.68	0.65	12	3.35
CSJ-41	S	P	P_S	13.75	3.5	8.47	25.72	3.64333	1.82167	0.391667	26.76	8.8	4.165	8.44	0.666667	18.2433	7.23333	2.39	2.87333	0.641667	12.8	3.62333
CSJ-44	S	P	P_S	15.93	3.7	12.14	31.77	2.34	1.57	0.785	26.85	8.1	2.68	8.02	0.575	28.9	4.9	2.73	3.475	0.725	10.1	3.15
CSJ-44	S	P	P_S	17	4.2	14	35.2	2.425	1.445	0.83	25.45	8.85	3.005	8.325	0.615	27.85	5.3	2.91	3.64	0.805	9.6	3.45
CSJ-44	S	P	P_S	12.68	5.14	13.25	31.07	2.33	1.64	0.75	26.35	7.5	3	7.89	0.53	29.4	4.6	2.855	3.415	0.665	10.05	2.95
CSJ-44	S	P	P_S	13.99	5.01	11	30	2.415	1.59167	0.828333	26.2767	8.2	2.935	8.13833	0.613333	28.7767	4.98333	2.87167	3.55	0.771667	9.96667	3.22333
CSJ-30	S	P	P_S	14.09	6.5	7.98	28.57	3.77	3.16	1.31	15.4	9.7	2.305	6.42	0.52	15.15	4.05	3.74	4.815	0.42	10.75	4.3
CSJ-30	S	P	P_S	16.45	4.85	6.59	27.89	4	3.25	1.37	15.9	10.3	2.62	6.47	0.565	14.45	4.6	3.605	4.705	0.46	10.05	4.6
CSJ-30	S	P	P_S	16.12	4.6	7.41	28.13	3.855	3.085	1.285	15	9.95	2.54	6	0.48	16.05	3.6	3.57	4.56	0.38	11	4.1
CSJ-30	S	P	P_S	13.45	4.7	7.22	25.37	3.925	3.205	1.36167	15.4933	10.0333	2.52833	6.35667	0.561667	15.2767	4.13333	3.67833	4.73333	0.46	10.65	4.37333
CSJ-25	S	P	P_S	16.91	4.94	10.05	31.9	2.585	3.25	0.34	31.85	10.2	2.165	5.74	0.675	18.75	6.45	1.58	3.77	0.795	16.65	3.9
CSJ-25	S	P	P_S	16.27	6.01	11.16	33.44	2.665	3.125	0.355	30.25	10.45	2.225	6.18	0.755	18.05	5.95	1.725	3.89	0.74	17.35	3.5
CSJ-25	S	P	P_S	15.99	4.7	12.08	32.77	2.645	3.415	0.365	31.55	9.45	2.21	5.805	0.61	19.2	6.9	1.645	3.705	0.87	16.05	4.2
CSJ-25	S	P	P_S	16.61	5.65	11.56	33.82	2.68167	3.30333	0.393333	31.2767	10.0833	2.24	5.96833	0.72	18.7267	6.48333	1.69	3.82833	0.841667	16.7333	3.90667
CSJ-26	S	P	P_S	12.87	3.6	7.69	24.16	2.355	5.095	1.835	18.05	7.55	3.39	7.49	0.875	10.4	5.55	2.055	3.44	0.79	9.3	2.85
CSJ-26	S	P	P_S	14.98	4.25	8.68	27.91	2.52	5.21	1.94	17.2	7.95	3.065	7.865	0.955	11.05	5.05	2.195	3.565	0.72	8.95	2.45
CSJ-26	S	P	P_S	16.23	3.27	8.15	27.65	2.435	4.91	1.845	17.95	7	3.46	7.51	0.84	9.65	6	2.095	3.385	0.825	9.45	3.15
CSJ-26	S	P	P_S	15.24	4.85	7.91	28	2.48667	5.11167	1.91333	17.7933	7.55	3.345	7.68167	0.93	10.4267	5.58333	2.155	3.50333	0.818333	9.28333	2.85667
CSJ-27	S	P	P_S	15.63	5.3	8.63	29.56	5.565	4.35	0.425	11.75	4.9	2.03	6.62	2.055	7.85	5.5	2.33	3.575	0.595	20.65	4.15
CSJ-27	S	P	P_S	16.94	4.5	7.46	28.9	5.945	4.165	0.475	10.8	5.35	2.265	7.495	2.145	7.35	5	2.295	3.275	0.525	21.3	3.75
CSJ-27	S	P	P_S	18.53	5.3	8.11	31.94	5.8	4.49	0.44	11.5	4.75	2.255	6.85	1.99	8.4	5.95	2.425	3.505	0.705	20	4.45
CSJ-27	S	P	P_S	18.05	4.5	7.04	29.59	5.82	4.375	0.486667	11.41	5.05	2.22333	7.04833	2.10333	7.92667	5.53333	2.39	3.49167	0.648333	20.7	4.15667
CSJ-48	S	P	P_S	21.4	6.55	9.21	37.16	3.69	4.5	0.64	12.8	7.95	2.88	8.215	0.32	26.85	7.75	2.085	3.56	0.43	14.9	4.05
CSJ-48	S	P	P_S	18.72	6.34	11.41	36.47	4	4.585	0.675	13.7	8.55	3.34	8.49	0.28	27.9	8.15	2.255	3.4	0.4	15.85	3.65
CSJ-48	S	P	P_S	21.13	7.42	12.01	40.56	3.72	4.42	0.625	12.5	7.5	3.21	8.525	0.35	26.05	7.45	2.23	3.415	0.47	14.05	4.35
CSJ-48	S	P	P_S	23.48	6.89	9.66	40.03	3.85333	4.54167	0.686667	13.06	8.05	3.18333	8.47	0.356667	26.9933	7.83333	2.23	3.49833	0.473333	14.9833	4.05667
CSJ-36	S	P	P_S	14.92	5.6	8.07	28.59	5.895	4.605	4.34	12.8	5.9	1.38	7.005	0.445	10.35	2.9	2.01	3.62	0.445	11.6	3.35
CSJ-36	S	P	P_S	15.12	5.62	9.11	29.85	5.695	4.51	4.56	12.05	5	1.47	7.265	0.395	10.65	3.3	1.88	3.805	0.505	10.5	2.95
CSJ-36	S	P	P_S	15.3	5.9	8.06	29.26	6.215	4.735	4.3	12.4	5.6	1.405	7	0.465	9.75	2.6	1.945	3.505	0.41	11.95	3.65
CSJ-36	S	P	P_S	14.68	6.2	9.14	30.02	5.985	4.65667	4.44	12.4767	5.55	1.45833	7.15	0.475	10.31	2.98333	1.985	3.68333	0.493333	11.4	3.35667
CSJ-37	S	P	P_S	18.42	6.34	8.56	33.32	5.37	4.89	1.235	12.15	5.9	1.625	5.825	0.85	9.05	3.05	2.185	3.88	0.49	14.9	3.85
CSJ-37	S	P	P_S	14.75	5.15	7.35	27.25	5.605	5.095	1.29	13.05	5.45	1.67	6.34	0.94	8.15	3.45	2.235	3.565	0.45	15.4	3.45
CSJ-37	S	P	P_S	12.91	6.1	7.17	26.18	5.47	4.775	1.2	11.75	6.2	1.685	5.95	0.81	9.6	2.75	2.31	3.96	0.52	13.7	4.15
CSJ-37	S	P	P_S	16.97	6.05	8.01	31.03	5.53167	4.96	1.28167	12.3767	5.9	1.7	6.09833	0.906667	8.99333	3.13333	2.28333	3.84167	0.526667	14.7167	3.85667
CSJ-3	S	P	P_S	14.83	4.6	9.14	28.57	2.57	3.605	2.42	18.45	7.25	3.02	8	0.2	8.25	6.9	2.71	3.465	0.565	12.1	3.1
CSJ-3	S	P	P_S	16.5	4.4	8.32	29.22	2.69	3.86	2.48	17.05	6.65	3.28	8.585	0.255	7.6	6.05	2.895	3.375	0.6	13	2.7
CSJ-3	S	P	P_S	15.47	4.1	8.05	27.62	2.685	3.575	2.505	17.95	7.5	3.21	8.225	0.18	8.8	7.55	2.755	3.495	0.52	11.15	3.4
CSJ-3	S	P	P_S	12.88	3.7	7.66	24.24	2.69833	3.72	2.50833	17.8767	7.18333	3.21	8.33	0.251667	8.27667	6.88333	2.82667	3.485	0.601667	12.1333	3.10667
CSJ-6	S	P	P_S	13.9	4	5.96	23.86	2.815	2.62	1.525	25.3	8.7	2.41	7.24	1.235	16.95	6.2	1.905	3.365	0.66	21.7	3.65
CSJ-6	S	P	P_S	15.49	4.65	6.39	26.53	3	2.5	1.58	24.3	9	2.425	6.985	1.315	17.55	5.35	2.13	3.56	0.675	22	3.25
CSJ-6	S	P	P_S	14.23	4.6	7.01	25.84	2.805	2.715	1.54	25.8	8.55	2.505	6.91	1.165	16.25	6.85	2.035	3.44	0.62	21.5	3.95
CSJ-6	S	P	P_S	13.26	3.94	6.69	23.89	2.92333	2.65167	1.58833	25.1933	8.8	2.48667	7.105	1.27833	16.9767	6.18333	2.06333	3.495	0.691667	21.7833	3.65667
CSJ-7	S	P	P_S	14.82	5.06	8.41	28.29	2.885	3.37	2.6	28.15	8.25	1.735	6.5	0.495	10.4	4.1	2.62	3.035	0.7	20.3	4.15
CSJ-7	S	P	P_S	17.4	4.05	9.02	30.47	2.925	3.26	2.67	26.8	8.05	1.785	6.545	0.56	11.05	3.25	2.815	3.26	0.81	19.75	4.45
CSJ-7	S	P	P_S	14.83	4.9	7.89	27.62	2.845	3.44	2.61	27.35	8.8	1.88	6.335	0.45	9.75	4.75	2.755	3.155	0.625	21.05	3.95
CSJ-7	S	P	P_S	15.65	4.48	8.15	28.28	2.935	3.39667	2.66667	27.4933	8.41667	1.84	6.52	0.541667	10.46	4.08333	2.77	3.19	0.751667	20.4167	4.22333
CSJ-8	S	P	P_S	15.87	4.7	8.12	28.69	2.78	3.26	2.28	19.25	7.1	3.06	9.795	0.695	13.25	7.65	2.89	3.5	0.7	17.95	3.5
CSJ-8	S	P	P_S	16.3	4.3	7.69	28.29	2.955	3.36	2.335	18.7	6.65	3.44	10.19	0.745	12.35	6.8	2.96	3.765	0.815	17.5	3.1
CSJ-8	S	P	P_S	15.06	4.31	8.74	28.11	2.84	3.165	2.295	18.5	7.6	3.27	9.83	0.625	14.4	8.3	2.815	3.555	0.61	18.5	3.8
CSJ-8	S	P	P_S	13.75	4.25	9.01	27.01	2.90833	3.30167	2.34333	18.8767	7.16667	3.29667	9.99833	0.728333	13.3933	7.63333	2.92833	3.64667	0.748333	18.0333	3.50667
CSJ-9	S	P	P_S	18.91	5.35	7.55	31.81	3.355	2.795	2.985	16.15	7.25	2.615	6.35	0.6	12.4	5.7	2.03	2.95	0.615	14.2	1.75
CSJ-9	S	P	P_S	14.65	5.14	6.92	26.71	3.55	2.905	3.06	17	7	2.73	6.57	0.525	11.3	4.85	2.175	3.005	0.72	14.8	1.35
CSJ-9	S	P	P_S	19.92	4.45	7.01	31.38	3.34	2.73	3.005	16.25	7.6	2.765	6.13	0.655	12.85	6.35	2	2.93	0.53	13.55	2.05
CSJ-9	S	P	P_S	13.68	4.5	6.14	24.32	3.465	2.85	3.05667	16.5267	7.33333	2.74333	6.41	0.633333	12.2433	5.68333	2.10833	3.00167	0.661667	14.2333	1.75667
CSJ-10	S	P	P_S	19.08	6.14	7.43	32.65	2.825	2.91	1.81	21.8	8.15	2.12	8.185	0.335	14.1	7.15	2.62	3.19	0.795	23.05	4.2
CSJ-10	S	P	P_S	15.76	5.31	9.02	30.09	2.94	2.705	1.905	20.55	8.55	2.23	8.255	0.275	13.15	6.3	2.82	3.215	0.7	22.3	3.8
CSJ-10	S	P	P_S	17.76	5.62	8.72	32.1	2.905	2.99	1.83	20.9	7.6	2.435	8.275	0.36	15.05	7.8	2.725	3.155	0.84	24	4.5
CSJ-10	S	P	P_S	16.13	6.45	7.29	29.87	2.94	2.90833	1.88833	21.1433	8.15	2.30167	8.29833	0.363333	14.16	7.13333	2.76167	3.22667	0.818333	23.1667	4.20667
CSJ-11	S	P	P_S	16.96	5.11	8.12	30.19	3.41	4.225	2.005	19.45	8	2.05	7.44	0.9	4.1	3.3	2.95	4.06	0.63	17.3	3.7
CSJ-11	S	P	P_S	13.77	4.8	7.64	26.21	3.52	4.065	2.045	18.05	7.45	2.075	7.27	1	3.75	2.45	3.12	4.205	0.6	16.7	3.3
CSJ-11	S	P	P_S	14.97	5.24	8.86	29.07	3.405	4.345	2	19	8.65	2.115	7.085	0.855	4.55	3.95	3.085	4.055	0.675	17.75	4
CSJ-11	S	P	P_S	16.32	5.3	8.26	29.88	3.495	4.25167	2.05667	18.8933	8.08333	2.12	7.325	0.958333	4.19333	3.28333	3.09167	4.14667	0.675	17.3	3.70667
CSJ-1	S	P	P_S	14.66	1.9	4.96	21.52	3.895	4.345	1.235	12.9	7	3.805	6.015	0.365	15.4	7.05	3.655	4.285	1.195	12.35	4.4
CSJ-1	S	P	P_S	15.79	2.01	5.44	23.24	4	4.215	1.275	12.2	7.4	3.955	6.315	0.4	16.05	7.6	3.84	4.285	1.07	13.3	4.7
CSJ-1	S	P	P_S	14.43	2.3	5.01	21.74	3.905	4.425	1.205	13.05	6.65	4.06	6.17	0.345	14.95	6.6	3.91	4.185	1.275	11.55	4.2
CSJ-1	S	P	P_S	15.26	2.5	4.99	22.75	3.98333	4.36833	1.27833	12.7767	7.06667	3.98	6.22667	0.41	15.5267	7.13333	3.84167	4.29167	1.22	12.45	4.47333
CSJ-23	S	P	P_S	20.51	4.2	9.01	33.72	4.71	4.1	0.34	34.1	9.75	1.99	6.095	0.645	13.05	5.15	1.935	3.285	0.645	7.8	3.4
CSJ-23	S	P	P_S	12.13	4.15	10.47	26.75	5.09	4.22	0.37	31.95	10.4	1.915	6.56	0.715	14.05	4.65	2.06	3.145	0.575	6.95	3
CSJ-23	S	P	P_S	15.46	3.5	8.96	27.92	4.76	4.06	0.35	33.4	9.25	1.9	6.5	0.565	12.5	5.6	1.975	3.19	0.7	8.45	3.7
CSJ-23	S	P	P_S	15.97	4.5	9.56	30.03	4.90333	4.16667	0.393333	33.21	9.85	1.975	6.445	0.681667	13.26	5.18333	2.03	3.24667	0.68	7.78333	3.40667
CSJ-22	S	P	P_S	14.37	3.15	7.56	25.08	3.85	4.155	0.43	18	9.15	4.335	8.06	1.41	25.4	9.8	3.085	3.865	0.655	17.15	4.9
CSJ-22	S	P	P_S	13.17	3.24	8.06	24.47	3.94	4.045	0.475	17.25	9	4.91	8.02	1.52	24.6	9.3	3.29	4.005	0.61	18.25	4.5
CSJ-22	S	P	P_S	13.65	2.4	6.69	22.74	3.82	4.215	0.45	18.45	9.55	4.66	7.565	1.325	26.05	10.25	3.115	3.775	0.735	16	5.2
CSJ-22	S	P	P_S	16.1	3.35	8.22	27.67	3.92	4.17833	0.491667	17.96	9.28333	4.675	7.94167	1.45833	25.41	9.83333	3.20333	3.92167	0.706667	17.1833	4.90667
CSJ-24	S	P	P_S	17.28	5.82	11.45	34.55	2.505	5.6	0.335	32.3	8.8	2.245	5.21	0.9	9.75	5.85	1.59	3.2	0.65	12.95	3.3
CSJ-24	S	P	P_S	14.76	5.39	12.39	32.54	2.595	5.71	0.34	31.3	9.1	2.14	5.725	0.825	10.5	5.35	1.745	3.155	0.735	12.2	2.9
CSJ-24	S	P	P_S	17.32	5.01	12.98	35.31	2.565	5.51	0.37	31.15	8.4	2.135	5.385	0.955	9.1	6.3	1.655	3.09	0.605	13.15	3.6
CSJ-24	S	P	P_S	14.95	5.91	11.09	31.95	2.605	5.64667	0.388333	31.6433	8.81667	2.21333	5.5	0.933333	9.84333	5.88333	1.70333	3.18833	0.703333	12.8167	3.30667
CSJ-14	S	P	P_S	18.99	7.3	11.94	38.23	2.335	2.68	0.83	18.55	8.4	2.75	5.52	1.175	9.45	6.1	2.5	3.15	0.65	15.5	3.95
CSJ-14	S	P	P_S	19.72	7.25	12.36	39.33	2.46	2.56	0.91	17.8	8.15	2.905	6.035	1.235	9.8	5.6	2.66	3.255	0.605	14.55	4.25
CSJ-14	S	P	P_S	20.88	7.4	11.75	40.03	2.4	2.62	0.845	17.55	8.7	2.815	5.71	1.095	9	6.55	2.585	3.11	0.71	15	3.75
CSJ-14	S	P	P_S	19.39	6.25	14.24	39.88	2.44833	2.66	0.901667	18.0267	8.46667	2.86333	5.815	1.20833	9.47667	6.13333	2.62167	3.21167	0.695	15.0667	4.02333
CSJ-17	S	P	P_S	17.97	6.8	10.89	35.66	3.1	2.775	1.07	13.7	7.5	2.675	6.475	0.625	11.25	6.5	2.265	2.775	0.61	19.2	2.65
CSJ-17	S	P	P_S	15.6	6.2	11.73	33.53	3.13	2.855	1.005	13.15	7.05	2.98	6.725	0.695	12.35	6	2.395	2.895	0.675	18.1	2.95
CSJ-17	S	P	P_S	18.13	7.1	9.69	34.92	3.255	2.615	1.15	13.3	7.35	3.02	6.35	0.605	10.05	6.95	2.23	2.705	0.57	19.75	2.45
CSJ-17	S	P	P_S	14.76	7.5	9.25	31.51	3.21167	2.78833	1.115	13.4433	7.35	2.93167	6.57667	0.681667	11.2767	6.53333	2.33667	2.83167	0.658333	19.0667	2.72333
CSJ-19	S	P	P_S	21.91	9.5	9.66	41.07	3.065	4.38	2.44	14.05	7.7	2.035	5.735	0.65	7.45	4.75	1.805	2.99	0.47	17.7	3.4
CSJ-19	S	P	P_S	16.96	9.03	10.04	36.03	3.17	4.52	2.505	13.4	7.3	2.055	6.455	0.63	8.05	3.9	1.975	3.07	0.43	18.45	3.7
CSJ-19	S	P	P_S	22.09	7.2	9.74	39.03	3.125	4.29	2.4	14.2	8.05	2.095	5.935	0.72	6.75	5.4	1.91	3.005	0.5	17	3.2
CSJ-19	S	P	P_S	18.68	7.3	10.63	36.61	3.17	4.43667	2.48833	13.9433	7.73333	2.10167	6.10167	0.706667	7.47667	4.73333	1.93667	3.06167	0.506667	17.7667	3.47333
CSJ-46	S	P	P_S	18.1	9.7	9.94	37.74	4.465	2.725	1.02	21.85	9.55	2.88	6.3	0.585	7.95	5.25	2.36	4.155	0.91	16.25	4.2
CSJ-46	S	P	P_S	15.49	8.4	11.06	34.95	4.585	2.67	1.075	20.5	10.35	3.115	5.735	0.605	8.55	5.65	2.265	4.335	0.965	15.55	4.5
CSJ-46	S	P	P_S	16.59	10.5	9.55	36.64	4.575	2.755	1	21.4	8.85	3.07	5.865	0.54	7.2	4.95	2.41	4.055	0.85	16.8	4
CSJ-46	S	P	P_S	17.7	10.6	10.71	39.01	4.59167	2.75667	1.07167	21.31	9.63333	3.06167	6.02667	0.616667	7.96	5.33333	2.385	4.22167	0.948333	16.25	4.27333

## Sheet: Physiological_raw_data
Genotype	Treat	Pn	E	Ci	WUE	APX	CAT	POX	SOD
CSJ-1	C	4.11	0.54	278.11	7.61111	9.41	2.43	21.81	13.24
CSJ-1	C	4.28	0.49	265.89	8.73469	10.23	2.25	21.11	12.38
CSJ-1	C	4.41	0.48	280.26	9.1875	10.19	2.31	20.33	13.16
CSJ-1	C	4.05	0.51	266.04	7.94118	9.74	2.29	20.75	12.69
CSJ-1	S	0.68	0.37	159.01	1.83784	12.08	2.58	22.95	16.02
CSJ-1	S	0.74	0.33	155.62	2.24242	13	2.46	24.09	15.89
CSJ-1	S	0.71	0.37	152.29	1.91892	12.81	2.54	23.51	17.12
CSJ-1	S	0.65	0.34	155.63	1.91176	12.66	2.44	24.17	16.34
CSJ-13	C	4.44	0.53	366.15	8.37736	12.62	2.08	26.87	16.3
CSJ-13	C	4.61	0.49	370.22	9.40816	13.14	1.98	28.04	17.68
CSJ-13	C	4.23	0.53	363.49	7.98113	11.96	2.09	25.88	17.02
CSJ-13	C	4.45	0.51	365.52	8.72549	12.35	1.94	27.04	15.61
CSJ-13	S	1.23	0.41	204.19	3	19.89	2.77	34.45	23.87
CSJ-13	S	1.26	0.38	211.78	3.31579	21.18	2.81	36.51	25.16
CSJ-13	S	1.19	0.38	217.94	3.13158	18.91	2.92	35.19	23.71
CSJ-13	S	1.37	0.35	202.88	3.91429	20.07	2.85	36.02	24.07
CSJ-19	C	3.78	0.69	305.17	5.47826	5.87	2.04	7.54	15.48
CSJ-19	C	3.61	0.69	298.95	5.23188	6.02	2.21	8.11	17.12
CSJ-19	C	3.55	0.73	302.17	4.86301	5.95	2.37	7.69	16.03
CSJ-19	C	3.69	0.74	300.59	4.98649	6.17	2.19	8.24	16.34
CSJ-19	S	2.54	0.58	244.78	4.37931	10.57	3.41	11.24	26.71
CSJ-19	S	2.67	0.62	251.35	4.30645	9.68	3.29	12.07	29.01
CSJ-19	S	2.66	0.57	248.39	4.66667	11.03	3.22	10.95	28.37
CSJ-19	S	2.72	0.58	246.94	4.68966	10.36	3.35	11.82	26.92
CSJ-18	C	3.04	0.68	361.04	4.47059	7.05	2.41	27.05	10.76
CSJ-18	C	2.87	0.74	355.27	3.87838	7.3	2.32	28.61	9.55
CSJ-18	C	2.89	0.71	352.78	4.07042	6.81	2.17	25.28	9.98
CSJ-18	C	3.11	0.69	364.29	4.50725	6.97	2.31	26.02	10.08
CSJ-18	S	2.37	0.55	195.68	4.30909	12.71	3.81	39.56	16.63
CSJ-18	S	2.42	0.59	198.59	4.10169	11.69	3.54	40.17	15.47
CSJ-18	S	2.37	0.54	196.77	4.38889	13.01	3.66	39.04	16.02
CSJ-18	S	2.31	0.61	193.62	3.78689	12.58	4.01	38.11	15.19
CSJ-28	C	3.27	0.85	255.61	3.84706	6.89	2.17	21.33	10.24
CSJ-28	C	2.98	0.81	261.38	3.67901	6.07	2.35	20.02	9.49
CSJ-28	C	3.04	0.79	260.07	3.8481	6.14	2.3	22.86	10.17
CSJ-28	C	3.17	0.82	258.49	3.86585	6.52	2.24	20.28	9.63
CSJ-28	S	1.56	0.58	160.38	2.68966	9.12	2.99	26.03	13.78
CSJ-28	S	1.63	0.55	162.55	2.96364	8.81	2.77	25.71	12.09
CSJ-28	S	1.49	0.64	157.32	2.32812	9.92	2.99	27.08	13.75
CSJ-28	S	1.62	0.59	160.17	2.74576	8.94	2.82	26.19	13.51
CSJ-42	C	2.04	0.82	263.04	2.4878	12.44	2.83	22.81	9.06
CSJ-42	C	2.13	0.79	259.38	2.6962	13.25	3.17	23.86	10.27
CSJ-42	C	1.98	0.77	260.49	2.57143	12.38	2.79	20.68	11.31
CSJ-42	C	2.21	0.83	264.72	2.66265	13.04	3.01	22.17	9.65
CSJ-42	S	0.85	0.49	164.02	1.73469	22.37	3.77	27.6	14.68
CSJ-42	S	0.87	0.54	167.28	1.61111	20.41	4.12	29.04	13.97
CSJ-42	S	0.83	0.51	169.33	1.62745	21.98	4.07	28.12	14.51
CSJ-42	S	0.92	0.48	162.95	1.91667	20.07	3.98	27.48	13.65
Note: C and S refer to control (0.70 dS/m) and saline irrigation (12.0 dS/m) treatments.
